# Supplementary material for: Molecular bixbyite-like In12-oxo clusters with tunable functionalization sites for lithography patterning applications
Source: Royal Society of Chemistry journal article supplement (doi:10.1039/d1sc04491e), 2021-01-01
Supplement: d1sc04491e1.pdf [file d1sc04491e1.pdf]

*Supporting Information*

**Molecular Bixbyite-Like In<sub>12</sub>-Oxo Clusters with Tunable Functionalization Sites for  
Lithography Patterning Applications**

Xiaofeng Yi<sup>1</sup>, Di Wang<sup>1,2</sup>, Fan Li<sup>1,2</sup>, Jian Zhang<sup>1</sup> and Lei Zhang<sup>1\*</sup>

<sup>1</sup>State Key Laboratory of Structural Chemistry, Fujian Institute of Research on the Structure of Matter, Chinese Academy of Sciences, Fuzhou, Fujian 350002, P. R. China.

<sup>2</sup>University of Chinese Academy of Sciences, Beijing 100049, P. R. China.

Email: [LZhang@fjirsm.ac.cn](mailto:LZhang@fjirsm.ac.cn)

**Content**

|                                                                                |            |
|--------------------------------------------------------------------------------|------------|
| <b>I. General methods and materials .....</b>                                  | <b>S2</b>  |
| <b>II. Synthesis .....</b>                                                     | <b>S3</b>  |
| <b>III. Single-crystal X-ray diffraction .....</b>                             | <b>S4</b>  |
| <b>IV. Bond valence sum calculations .....</b>                                 | <b>S9</b>  |
| <b>V. Additional structural pictures .....</b>                                 | <b>S11</b> |
| <b>VI. Powder-XRD patterns.....</b>                                            | <b>S17</b> |
| <b>VII. The energy dispersive X-ray spectroscopy (EDS) spectra .....</b>       | <b>S20</b> |
| <b>VIII. Thermogravimetical analysis (TGA) .....</b>                           | <b>S22</b> |
| <b>IX. IR spectra .....</b>                                                    | <b>S25</b> |
| <b>X. Electrospray ionization mass spectrometry measurements (ESI-MS).....</b> | <b>S30</b> |
| <b>XI. UV-Vis parameters .....</b>                                             | <b>S33</b> |
| <b>XII. Patterning performance investigations .....</b>                        | <b>S34</b> |

## I. General methods and materials

All the reagents and solvents employed are purchased commercially and used as received without further treatment. Propylene glycol 1-monomethyl ether 2-acetate (PGMEA), *p*-fluorophenol and InBr<sub>3</sub> were purchased from energy chemical. *p*-nitrophenol and InCl<sub>3</sub>·4H<sub>2</sub>O were purchased from Aladdin. While isopropanol (IPA), methanol, phenol, tetrahydrofuran and diethanolamine were bought from Sino pharm Chemical Reagent Beijing. Powder X-ray diffraction (PXRD) analyses data were mounted on a Rigaku Mini Flex II diffractometer using Cu K $\alpha$  radiation ( $\lambda = 1.54056 \text{ \AA}$ ) under ambient conditions. The Fourier transform infrared (FT-IR) spectra (KBr pellets) were performed on Bruker VERTEX 70 over a range of 400-4000 cm<sup>-1</sup>. Thermal stabilities were investigated by a Mettler Toledo TGA/SDTA 851e analyzer in N<sub>2</sub> atmosphere with a heating rate of 10 °C/min under N<sub>2</sub> atmosphere. The electrospray ionization mass spectrometry (ESI-MS) data were collected on Impact II UHR-TOF (Bruker). Elemental analyses were measured on a Vario MICRO Elemental Analyzer instrument. The UV-vis absorption spectra are recorded at room temperature on a Lamda35 UV spectrophotometer and scanned at 268-800 nm. The energy dispersive spectroscopy (EDS) analyses of single crystals were performed on a JEOL JSM6700F field-emission scanning electron microscope equipped with an Oxford INCA system. The film thickness was measured by Ellipsometry-J. A. Woollam V-VASE. The film was exposed to an electron-beam using Raith quantum. The topography and the surface roughness of the sample are characterized by means of AFM-Bruker Dimension ICON and Asylum Research-Cypher. SEM images for patterns are performed by Zeiss Supra55.

## II. Synthesis

Synthesis of **InOC-1**: A mixture of  $\text{InCl}_3 \cdot 4\text{H}_2\text{O}$  (293 mg, 1 mmol), diethanolamine (1 mL),  $\text{CH}_3\text{OH}$  (3 mL) was sealed in a 20 mL vial and transferred to an oven at 100 °C for 2 days. When cooled to room temperature, block colorless crystals formed. (yield: 210 mg, 95.56% based on In). Elemental analysis (%) for  $\text{C}_{36}\text{H}_{86}\text{Cl}_6\text{In}_{12}\text{N}_8\text{O}_{26}$ , *calc.*: C, 16.39; H, 3.29; N, 4.25; found: C, 16.36; H, 3.46; N, 4.23.

Synthesis of **InOC-2**: A mixture of  $\text{InBr}_3 \cdot 4\text{H}_2\text{O}$  (354 mg, 1 mmol), diethanolamine (1.5 mL),  $\text{CH}_3\text{OH}$  (3 mL) was sealed in a 20 mL vial and transferred to an oven at 100 °C for 2 days. When cooled to room temperature, block colorless crystals formed. (yield: 155mg, 61.99% based on In). Elemental analysis (%) for  $\text{C}_{39}\text{H}_{98}\text{Br}_6\text{In}_{12}\text{N}_8\text{O}_{29}$ , *calc.*: C, 15.61; H, 3.29; N, 3.73; found: C, 15.87; H, 3.27; N, 3.87.

Synthesis of **InOC-3**: A mixture of  $\text{InCl}_3 \cdot 4\text{H}_2\text{O}$  (293 mg, 1 mmol), *p*-nitrophenol (700 mg, 5 mmol), diethanolamine (1 mL), tetrahydrofuran (4 mL) was sealed in a 20 mL vial and transferred to an oven at 100 °C for 2 days. When cooled to room temperature, block yellowish crystals formed. The crystals are washing with tetrahydrofuran before collected. (yield: 120mg, 46.97% based on In). Elemental analysis (%) for  $\text{C}_{56}\text{H}_{90}\text{Cl}_6\text{In}_{12}\text{N}_{12}\text{O}_{34}$ , *calc.*: C, 21.94; H, 2.96; N, 5.48; found: C, 22.16; H, 2.84; N, 5.40.

Synthesis of **InOC-4**: A mixture of  $\text{InBr}_3 \cdot 4\text{H}_2\text{O}$  (354 mg, 1 mmol), *p*-nitrophenol (700 mg, 5 mmol), diethanolamine (0.5 mL), tetrahydrofuran (4 mL) was sealed in a 20 mL vial and transferred to a oven at 100 °C for 2 days. When cooled to room temperature, block yellowish crystals formed. (yield: 171mg, 61.58% based on In). Elemental analysis (%) for  $\text{C}_{56}\text{H}_{90}\text{Br}_6\text{In}_{12}\text{N}_{12}\text{O}_{34}$ , *calc.*: C, 20.18; H, 2.72; N, 5.04; found: C, 18.59; H, 3.02; N, 4.82.

Synthesis of **InOC-5**: A mixture of  $\text{InCl}_3 \cdot 4\text{H}_2\text{O}$  (293 mg, 1 mmol), *p*-fluorophenol (550 mg, 5 mmol), diethanolamine (1 mL), tetrahydrofuran (4 mL) was sealed in a 20 mL vial and transferred to a oven at 100 °C for 2 days. When cooled to room temperature, block light crystals formed. (yield: 115mg, 46.67% based on In). Elemental analysis (%) for  $\text{C}_{56}\text{H}_{90}\text{Cl}_6\text{F}_4\text{In}_{12}\text{N}_8\text{O}_{26} \cdot 2\text{NH}(\text{CH}_2\text{CH}_2\text{OH})_2$ , *calc.*: C, 24.26; H, 3.56; N, 4.42; found: C, 25.31; H, 3.44; N, 4.21.

### III. Single-crystal X-ray diffraction

Single-crystal diffraction data for **InOC-1** and **InOC-2** were collected on Hybrid Pixel Array detector equipped with Ga-K $\alpha$  radiation ( $\lambda = 1.3405 \text{ \AA}$ ) at about 293~298 K, while **InOC-3**, **InOC-4** and **KLD-5** were collected on Supernova single crystal diffractometer equipped with graphite-monochromatic Cu-K $\alpha$  radiation ( $\lambda = 1.54184 \text{ \AA}$ ) at about 100 K. Using Olex2,<sup>[1]</sup> the structures were solved with the dual-direct methods using ShelxT and refined with the full-matrix least-squares technique based on  $F^2$  using the *SHELXL*.<sup>[2]</sup> Non-hydrogen atoms were refined anisotropically. Hydrogen atoms were added theoretically. The obtained crystallographic data for **InOC-1** to **InOC-5** summarized in Table S1 to Table S5. The X-ray crystallographic coordinates for structures reported in this article have been deposited at the Cambridge Crystallographic Data Centre (CCDC) under deposition numbers CCDC 2078614-2078618 (**InOC-1** to **InOC-5**). These data can be obtained free of charge from the Cambridge Crystallographic Data Centre via [http://www.ccdc.cam.ac.uk/data\\_request/cif](http://www.ccdc.cam.ac.uk/data_request/cif).

**Table S1** Crystal data and structure refinement for **InOC-1**.

|                                    |                                                                                                 |
|------------------------------------|-------------------------------------------------------------------------------------------------|
| Crystal formula                    | C <sub>36</sub> H <sub>84</sub> Cl <sub>6</sub> In <sub>12</sub> N <sub>8</sub> O <sub>26</sub> |
| Formula weight                     | 2635.65                                                                                         |
| Temperature/K                      | 293(2)                                                                                          |
| Crystal system                     | monoclinic                                                                                      |
| Space group                        | I2                                                                                              |
| a/ $\text{\AA}$                    | 16.05120(10)                                                                                    |
| b/ $\text{\AA}$                    | 11.42060(10)                                                                                    |
| c/ $\text{\AA}$                    | 20.21170(10)                                                                                    |
| $\alpha/^\circ$                    | 90                                                                                              |
| $\beta/^\circ$                     | 90.1940(10)                                                                                     |
| $\gamma/^\circ$                    | 90                                                                                              |
| Volume/ $\text{\AA}^3$             | 3705.07(4)                                                                                      |
| Z                                  | 2                                                                                               |
| $\rho_{\text{calc}}/\text{g/cm}^3$ | 2.362                                                                                           |
| $\mu/\text{mm}^{-1}$               | 21.288                                                                                          |
| F(000)                             | 2508.0                                                                                          |
| Crystal size/ $\text{mm}^3$        | 0.8 $\times$ 0.7 $\times$ 0.6                                                                   |
| Radiation                          | GaK $\alpha$ ( $\lambda = 1.3405$ )                                                             |
| Index ranges                       | -21 $\leq$ h $\leq$ 20, -15 $\leq$ k $\leq$ 14, -27 $\leq$ l $\leq$ 27                          |
| Reflections collected              | 43834                                                                                           |

|                                                |                                                                  |
|------------------------------------------------|------------------------------------------------------------------|
| Independent reflections                        | 9088 [ $R_{\text{int}} = 0.0720$ , $R_{\text{sigma}} = 0.0361$ ] |
| Data/restraints/parameters                     | 9088/1/400                                                       |
| Goodness-of-fit on $F^2$                       | 1.036                                                            |
| Final R indexes [ $I \geq 2\sigma(I)$ ]        | $R_1 = 0.0335$ , $wR_2 = 0.0911$                                 |
| Final R indexes [all data]                     | $R_1 = 0.0340$ , $wR_2 = 0.0915$                                 |
| Largest diff. peak/hole / $e \text{ \AA}^{-3}$ | 1.13/-1.33                                                       |

**Table S2** Crystal data and structure refinement for **InOC-2**.

|                                         |                                                                              |
|-----------------------------------------|------------------------------------------------------------------------------|
| Crystal formula                         | $\text{C}_{36}\text{H}_{84}\text{Br}_6\text{In}_{12}\text{N}_8\text{O}_{26}$ |
| Formula weight                          | 2902.41                                                                      |
| Temperature/K                           | 293(2)                                                                       |
| Crystal system                          | triclinic                                                                    |
| Space group                             | P-1                                                                          |
| $a/\text{\AA}$                          | 11.5427(3)                                                                   |
| $b/\text{\AA}$                          | 26.8196(3)                                                                   |
| $c/\text{\AA}$                          | 26.8568(5)                                                                   |
| $\alpha/^\circ$                         | 101.1820(10)                                                                 |
| $\beta/^\circ$                          | 102.181(2)                                                                   |
| $\gamma/^\circ$                         | 96.092(2)                                                                    |
| Volume/ $\text{\AA}^3$                  | 7878.3(3)                                                                    |
| Z                                       | 4                                                                            |
| $\rho_{\text{calc}}/\text{cm}^3$        | 2.447                                                                        |
| $\mu/\text{mm}^{-1}$                    | 21.535                                                                       |
| F(000)                                  | 5448.0                                                                       |
| Crystal size/ $\text{mm}^3$             | $0.1 \times 0.08 \times 0.06$                                                |
| Radiation                               | $\text{GaK}\alpha$ ( $\lambda = 1.3405$ )                                    |
| Index ranges                            | $-14 \leq h \leq 14$ , $-34 \leq k \leq 34$ , $-28 \leq l \leq 34$           |
| Reflections collected                   | 104803                                                                       |
| Independent reflections                 | 34943 [ $R_{\text{int}} = 0.0750$ , $R_{\text{sigma}} = 0.0721$ ]            |
| Data/restraints/parameters              | 34943/14/1602                                                                |
| Goodness-of-fit on $F^2$                | 1.045                                                                        |
| Final R indexes [ $I \geq 2\sigma(I)$ ] | $R_1 = 0.0754$ , $wR_2 = 0.1826$                                             |

|                                                |                                  |
|------------------------------------------------|----------------------------------|
| Final R indexes [all data]                     | $R_1 = 0.1138$ , $wR_2 = 0.2024$ |
| Largest diff. peak/hole / $e \text{ \AA}^{-3}$ | 2.39/-1.93                       |

**Table S3** Crystal data and structure refinement for **InOC-3**.

|                                                |                                                                    |
|------------------------------------------------|--------------------------------------------------------------------|
| Crystal formula                                | $C_{56}H_{88}Cl_6In_{12}N_{12}O_{34}$                              |
| Formula weight                                 | 3063.92                                                            |
| Temperature/K                                  | 100.0(2)                                                           |
| Crystal system                                 | tetragonal                                                         |
| Space group                                    | I-4                                                                |
| $a/\text{\AA}$                                 | 15.9892(2)                                                         |
| $b/\text{\AA}$                                 | 15.9892(2)                                                         |
| $c/\text{\AA}$                                 | 20.3659(5)                                                         |
| $\alpha/^\circ$                                | 90                                                                 |
| $\beta/^\circ$                                 | 90                                                                 |
| $\gamma/^\circ$                                | 90                                                                 |
| Volume/ $\text{\AA}^3$                         | 5206.63(18)                                                        |
| Z                                              | 2                                                                  |
| $\rho_{\text{calc}}/\text{g/cm}^3$             | 1.954                                                              |
| $\mu/\text{mm}^{-1}$                           | 22.853                                                             |
| F(000)                                         | 2940.0                                                             |
| Crystal size/ $\text{mm}^3$                    | $0.11 \times 0.1 \times 0.05$                                      |
| Radiation                                      | $\text{CuK}\alpha$ ( $\lambda = 1.54184$ )                         |
| Index ranges                                   | $-15 \leq h \leq 19$ , $-16 \leq k \leq 19$ , $-25 \leq l \leq 24$ |
| Reflections collected                          | 19375                                                              |
| Independent reflections                        | 5146 [ $R_{\text{int}} = 0.0559$ , $R_{\text{sigma}} = 0.0410$ ]   |
| Data/restraints/parameters                     | 5146/61/276                                                        |
| Goodness-of-fit on $F^2$                       | 1.048                                                              |
| Final R indexes [ $I \geq 2\sigma(I)$ ]        | $R_1 = 0.0565$ , $wR_2 = 0.1445$                                   |
| Final R indexes [all data]                     | $R_1 = 0.0601$ , $wR_2 = 0.1484$                                   |
| Largest diff. peak/hole / $e \text{ \AA}^{-3}$ | 1.23/-1.40                                                         |

**Table S4** Crystal data and structure refinement for **InOC-4**.

|                                             |                                                                                                  |
|---------------------------------------------|--------------------------------------------------------------------------------------------------|
| Crystal formula                             | C <sub>56</sub> H <sub>68</sub> Br <sub>6</sub> In <sub>12</sub> N <sub>12</sub> O <sub>34</sub> |
| Formula weight                              | 3310.52                                                                                          |
| Temperature/K                               | 100.01(12)                                                                                       |
| Crystal system                              | tetragonal                                                                                       |
| Space group                                 | I-4                                                                                              |
| a/Å                                         | 16.1018(4)                                                                                       |
| b/Å                                         | 16.1018(4)                                                                                       |
| c/Å                                         | 20.4257(8)                                                                                       |
| α/°                                         | 90                                                                                               |
| β/°                                         | 90                                                                                               |
| γ/°                                         | 90                                                                                               |
| Volume/Å <sup>3</sup>                       | 5295.7(3)                                                                                        |
| Z                                           | 2                                                                                                |
| ρ <sub>calc</sub> /cm <sup>3</sup>          | 2.076                                                                                            |
| μ/mm <sup>-1</sup>                          | 23.728                                                                                           |
| F(000)                                      | 3116.0                                                                                           |
| Crystal size/mm <sup>3</sup>                | 0.12 × 0.1 × 0.06                                                                                |
| Radiation                                   | CuKα (λ = 1.54184)                                                                               |
| Index ranges                                | -11 ≤ h ≤ 19, -19 ≤ k ≤ 16, -24 ≤ l ≤ 17                                                         |
| Reflections collected                       | 7312                                                                                             |
| Independent reflections                     | 4325 [R <sub>int</sub> = 0.0407, R <sub>sigma</sub> = 0.0464]                                    |
| Data/restraints/parameters                  | 4325/156/276                                                                                     |
| Goodness-of-fit on F <sup>2</sup>           | 1.067                                                                                            |
| Final R indexes [I >= 2σ (I)]               | R <sub>1</sub> = 0.0759, wR <sub>2</sub> = 0.1999                                                |
| Final R indexes [all data]                  | R <sub>1</sub> = 0.0793, wR <sub>2</sub> = 0.2069                                                |
| Largest diff. peak/hole / e Å <sup>-3</sup> | 1.71/-2.14                                                                                       |

**Table S5** Crystal data and structure refinement for **InOC-5**.

|                                             |                                                                                                                |
|---------------------------------------------|----------------------------------------------------------------------------------------------------------------|
| Crystal formula                             | C <sub>56</sub> H <sub>88</sub> Cl <sub>6</sub> F <sub>4</sub> In <sub>12</sub> N <sub>8</sub> O <sub>26</sub> |
| Formula weight                              | 2955.88                                                                                                        |
| Temperature/K                               | 100.03(19)                                                                                                     |
| Crystal system                              | tetragonal                                                                                                     |
| Space group                                 | I-4                                                                                                            |
| a/Å                                         | 15.9744(2)                                                                                                     |
| b/Å                                         | 15.9744(2)                                                                                                     |
| c/Å                                         | 19.4804(5)                                                                                                     |
| α/°                                         | 90                                                                                                             |
| β/°                                         | 90                                                                                                             |
| γ/°                                         | 90                                                                                                             |
| Volume/Å <sup>3</sup>                       | 4971.04(18)                                                                                                    |
| Z                                           | 2                                                                                                              |
| ρ <sub>calc</sub> /cm <sup>3</sup>          | 1.975                                                                                                          |
| μ/mm <sup>-1</sup>                          | 23.891                                                                                                         |
| F(000)                                      | 2828.0                                                                                                         |
| Crystal size/mm <sup>3</sup>                | 0.08 × 0.06 × 0.05                                                                                             |
| Radiation                                   | CuKα (λ = 1.54178)                                                                                             |
| Index ranges                                | -17 ≤ h ≤ 17, -17 ≤ k ≤ 16, -21 ≤ l ≤ 21                                                                       |
| Reflections collected                       | 10192                                                                                                          |
| Independent reflections                     | 3465 [R <sub>int</sub> = 0.0303, R <sub>sigma</sub> = 0.0257]                                                  |
| Data/restraints/parameters                  | 3465/36/254                                                                                                    |
| Goodness-of-fit on F <sup>2</sup>           | 1.086                                                                                                          |
| Final R indexes [I ≥ 2σ (I)]                | R <sub>1</sub> = 0.0275, wR <sub>2</sub> = 0.0709                                                              |
| Final R indexes [all data]                  | R <sub>1</sub> = 0.0280, wR <sub>2</sub> = 0.0712                                                              |
| Largest diff. peak/hole / e Å <sup>-3</sup> | 1.48/-0.58                                                                                                     |



#### IV. Bond valence sum calculations

Bond valence sum calculations<sup>[3]</sup> are performed on **InOC-1 (Table S6)**, **InOC-2 (Table S7)**, **InOC-3 (Table S8)**, **InOC-4 (Table S9)** and **InOC-5 (Table S10)**. The BVS values for the oxygen atoms suggest that there exists protonation of some oxygen positions in the skeleton of these In<sub>12</sub>-oxo-clusters with BVS value of *ca.* 1.

**Table S6** Bond valence sum values for oxygen atoms in **InOC-1**.

|           |              |            |              |     |       |     |       |    |       |
|-----------|--------------|------------|--------------|-----|-------|-----|-------|----|-------|
| O00J      | -1.98        | O1         | -1.98        | O2  | -1.95 | O3  | -1.91 | O4 | -2.04 |
| <b>O5</b> | <b>-1.05</b> | O6         | -1.97        | O7  | -2.07 | O8  | -1.96 | O9 | -1.93 |
| O10       | -2.01        | <b>O11</b> | <b>-1.01</b> | O12 | -2.05 | O13 | -1.96 |    |       |

**Table S7** Bond valence sum values for oxygen atoms in **InOC-2**.

|            |              |            |              |     |       |            |              |     |       |
|------------|--------------|------------|--------------|-----|-------|------------|--------------|-----|-------|
| O1         | -1.95        | O2         | -1.96        | O3  | -1.94 | <b>O4</b>  | <b>-1.00</b> | O5  | -1.83 |
| O6         | -1.95        | O7         | -2.01        | O8  | -2.06 | O9         | -1.95        | O10 | -1.90 |
| O11        | -1.99        | O12        | -2.10        | O13 | -1.80 | O14        | -1.98        | O15 | -2.03 |
| O16        | -2.05        | O17        | -1.94        | O18 | -2.03 | O19        | -2.03        | O20 | -1.92 |
| O21        | -2.01        | <b>O22</b> | <b>-1.02</b> | O23 | -2.00 | O24        | -2.02        | O25 | -2.04 |
| O26        | -1.94        | O27        | -1.93        | O28 | -2.03 | <b>O29</b> | <b>-1.03</b> | O30 | -2.06 |
| O31        | -1.97        | O32        | -2.08        | O33 | -1.94 | O34        | -1.98        | O35 | -1.99 |
| O36        | -2.06        | O37        | -2.10        | O38 | -1.87 | O39        | -2.00        | O40 | -1.98 |
| O41        | -2.05        | O42        | -1.89        | O43 | -2.03 | O44        | -1.73        | O45 | -1.95 |
| O46        | -1.83        | O47        | -2.05        | O48 | -2.02 | O49        | -2.03        | O50 | -1.96 |
| <b>O51</b> | <b>-1.06</b> | O52        | -2.01        |     |       |            |              |     |       |

**Table S8** Bond valence sum values for oxygen atoms in **InOC-3**.

|    |       |    |       |    |       |           |              |    |       |
|----|-------|----|-------|----|-------|-----------|--------------|----|-------|
| O3 | -2.43 | O4 | -2.03 | O5 | -2.05 | <b>O6</b> | <b>-1.08</b> | O7 | -2.17 |
| O8 | -1.89 | O9 | -2.04 |    |       |           |              |    |       |

**Table S9** Bond valence sum values for oxygen atoms in **InOC-4**.

|    |       |    |       |           |              |    |       |    |       |
|----|-------|----|-------|-----------|--------------|----|-------|----|-------|
| O3 | -2.11 | O4 | -2.26 | <b>O5</b> | <b>-1.08</b> | O6 | -2.04 | O7 | -1.91 |
| O8 | -2.08 | O9 | -1.88 |           |              |    |       |    |       |

**Table S10** Bond valence sum values for oxygen atoms in **InOC-5**.

|    |       |           |              |    |       |    |       |    |       |
|----|-------|-----------|--------------|----|-------|----|-------|----|-------|
| O1 | -2.00 | <b>O2</b> | <b>-1.07</b> | O3 | -2.19 | O4 | -2.03 | O5 | -2.02 |
| O6 | -1.87 | O7        | -2.03        |    |       |    |       |    |       |

## V. Additional structural pictures

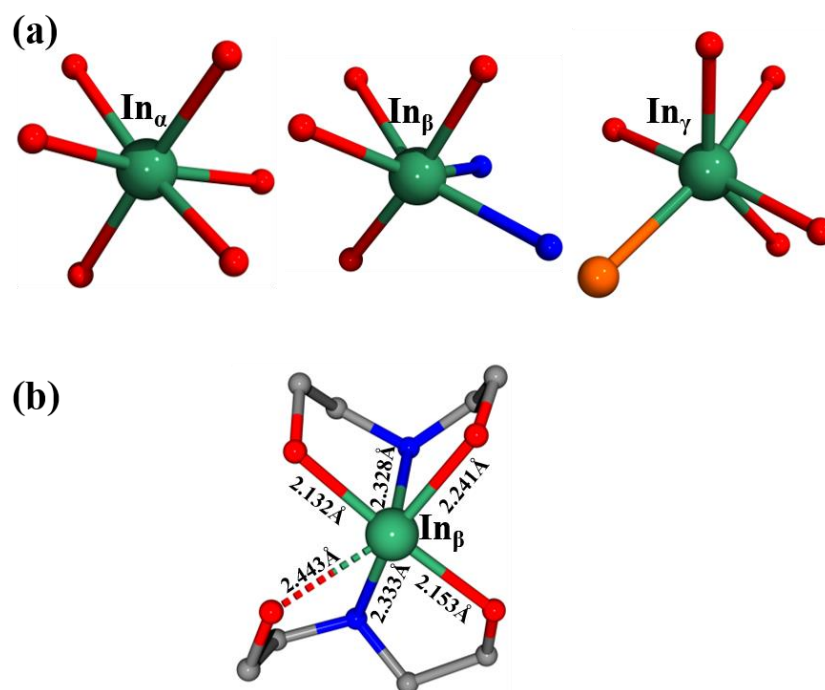

**Figure S1 (a)** The coordination environment of  $\text{In}_\alpha$   $\{\text{InO}_6\}$ ,  $\text{In}_\beta$   $\{\text{InO}_5\text{Cl}\}$  and  $\text{In}_\gamma$   $\{\text{InO}_4\text{N}_2\}$  in **InOC-1** to **InOC-5**. **(b)** Structural details and coordination modes of diethanol amine in **InOC-1** to **InOC-5**.

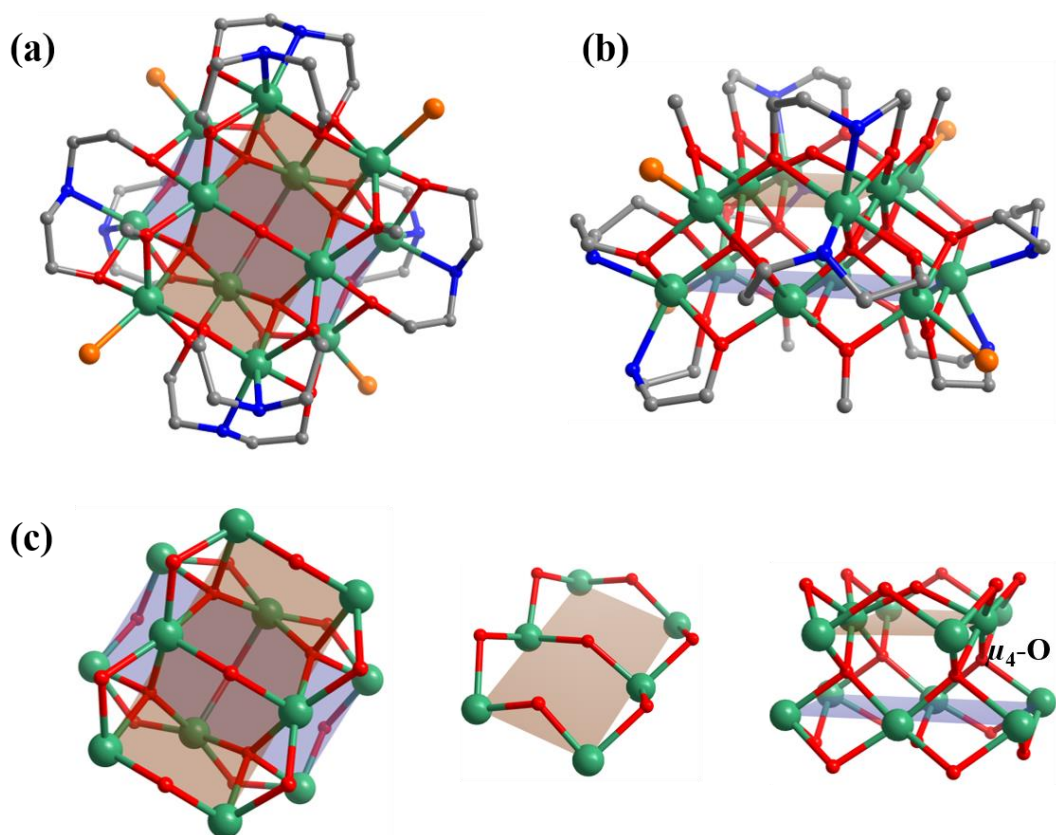

**Figure S2** Top view (a) and side view (b) towards molecular structure of **InOC-1** with highlighted In<sub>6</sub> building units. (c) Illustration of the rectangular In<sub>6</sub> building units and the arrangements of two pairs of In<sub>6</sub>-rectangle in **InOC-1** to **InOC-5**.

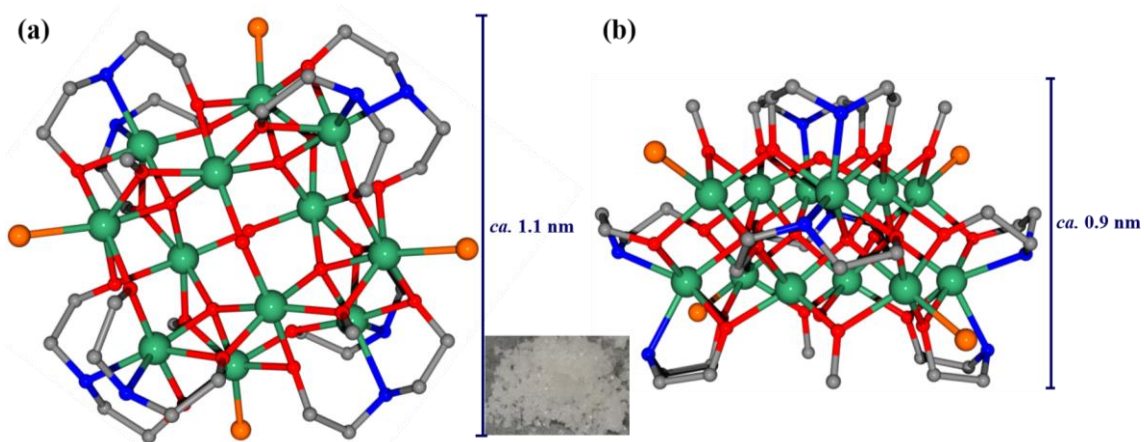

**Figure S3** Molecular structure of **InOC-1** in top view (a) and side view (b). The side length and thickness are also presented.

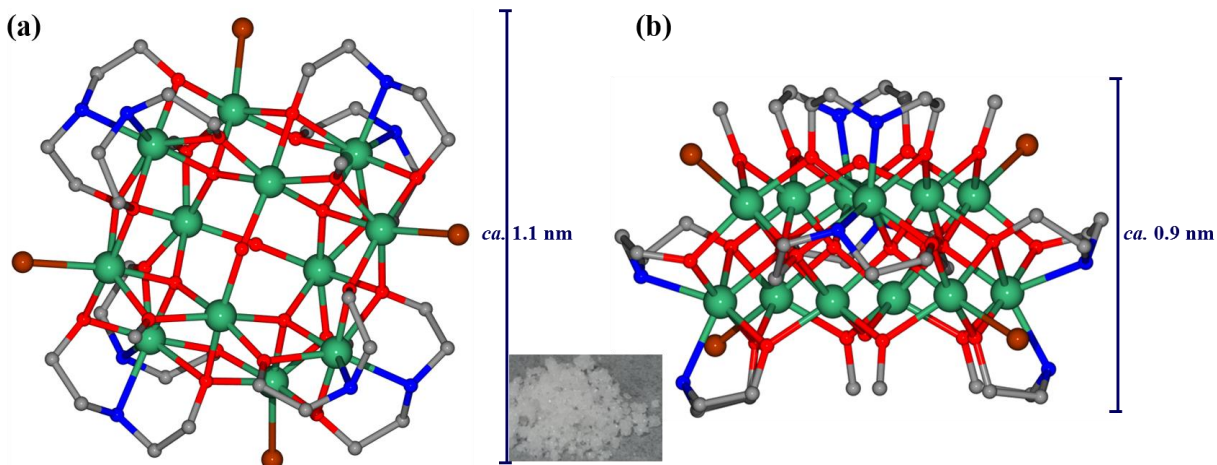

**Figure S4** Molecular structure of **InOC-2** in top view **(a)** and side view **(b)**. The side length and thickness are also presented.

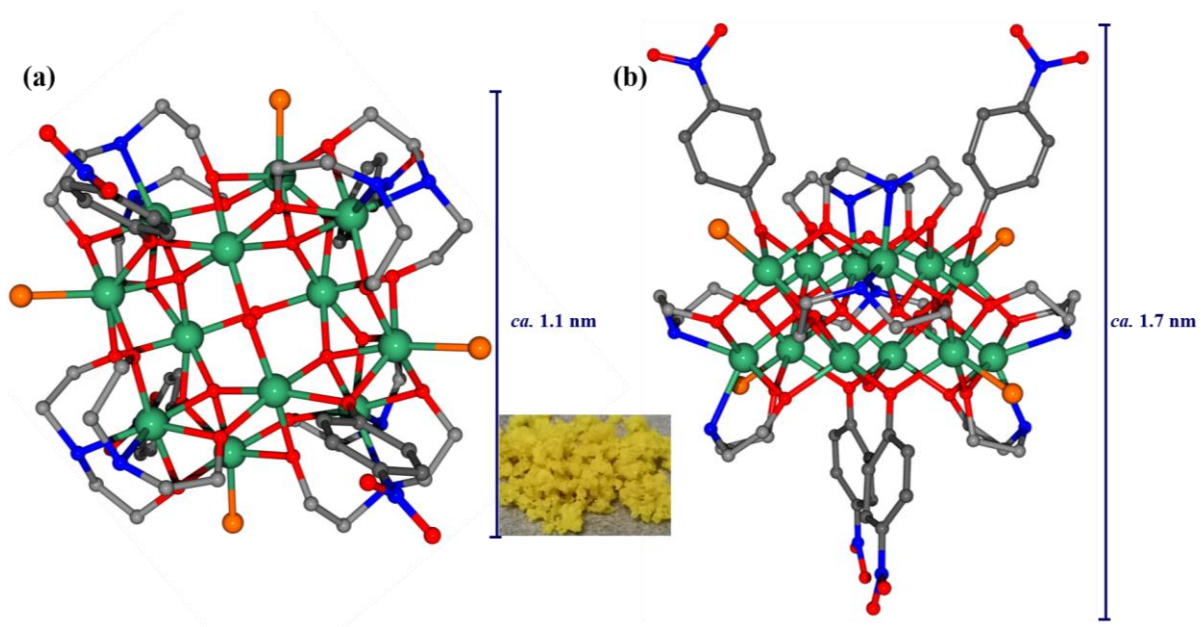

**Figure S5** Molecular structure of **InOC-3** in top view **(a)** and side view **(b)**. The side length and thickness are also presented.

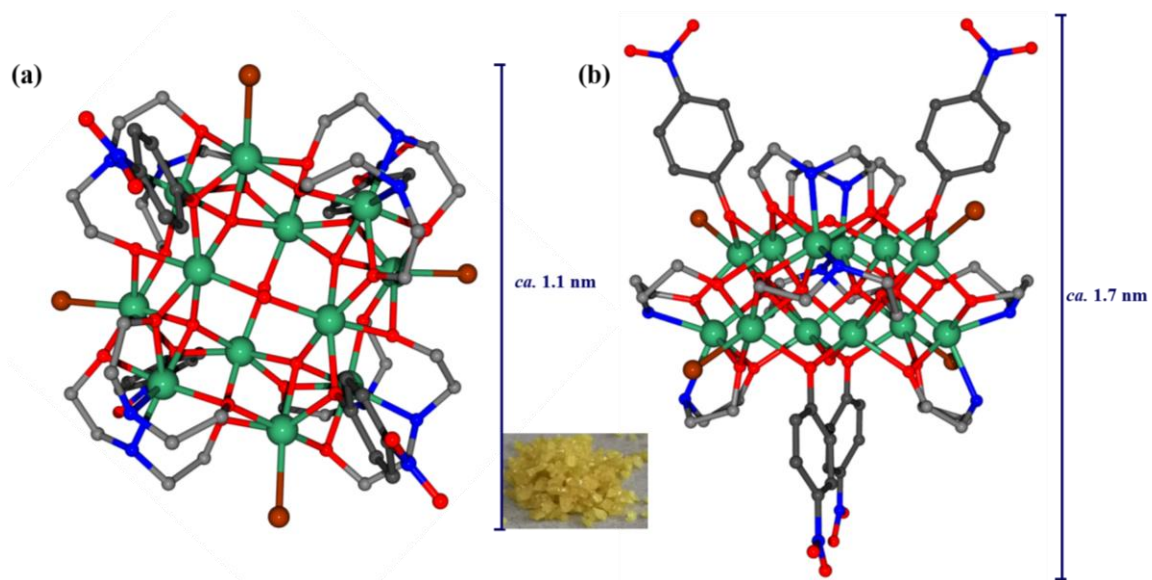

**Figure S6** Molecular structure of **InOC-4** in top view (a) and side view (b). The side length and thickness are also presented.

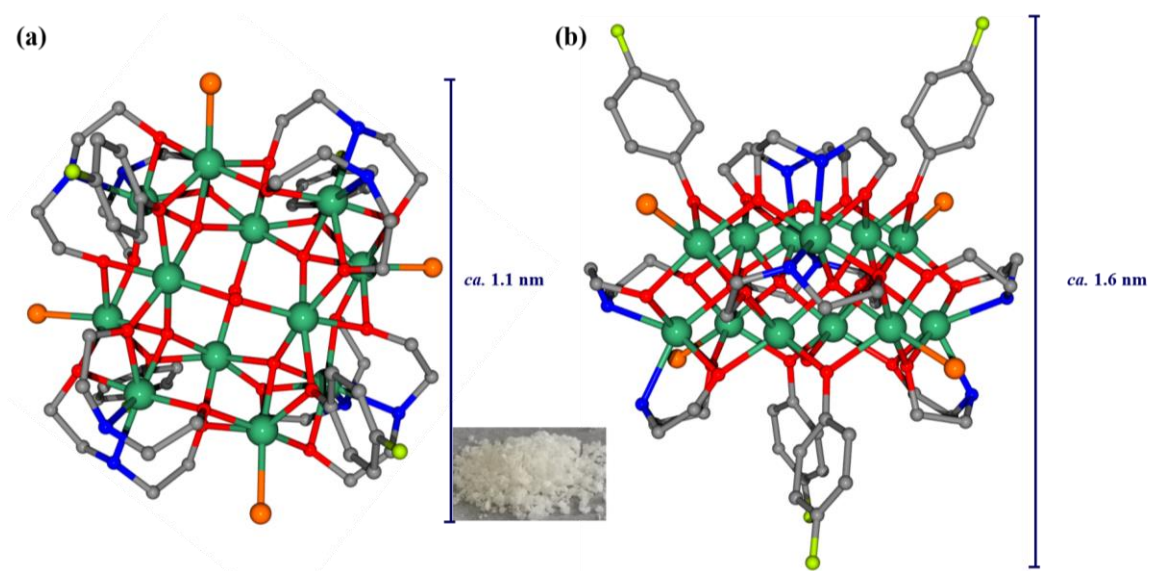

**Figure S7** Molecular structure of **InOC-5** in top view (a) and side view (b). The side length and thickness are also presented.



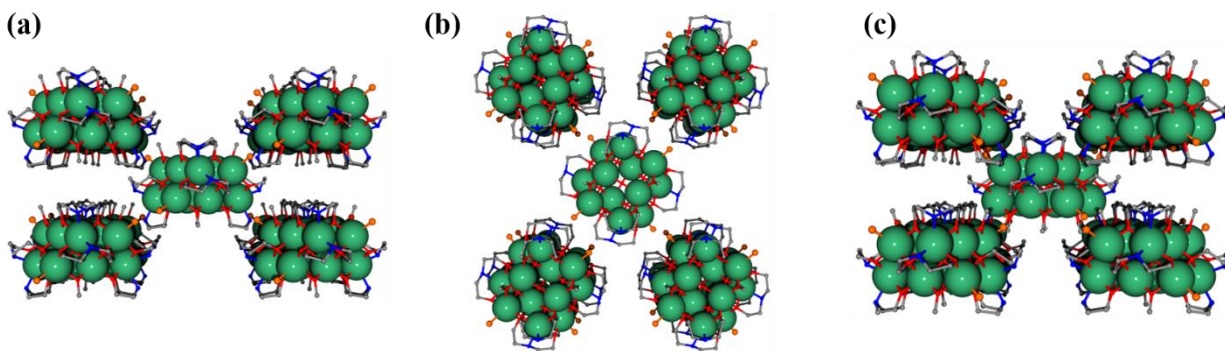

**Figure S8** Packing mode of **InOC-1** along axis *a*, *b* and *c*.

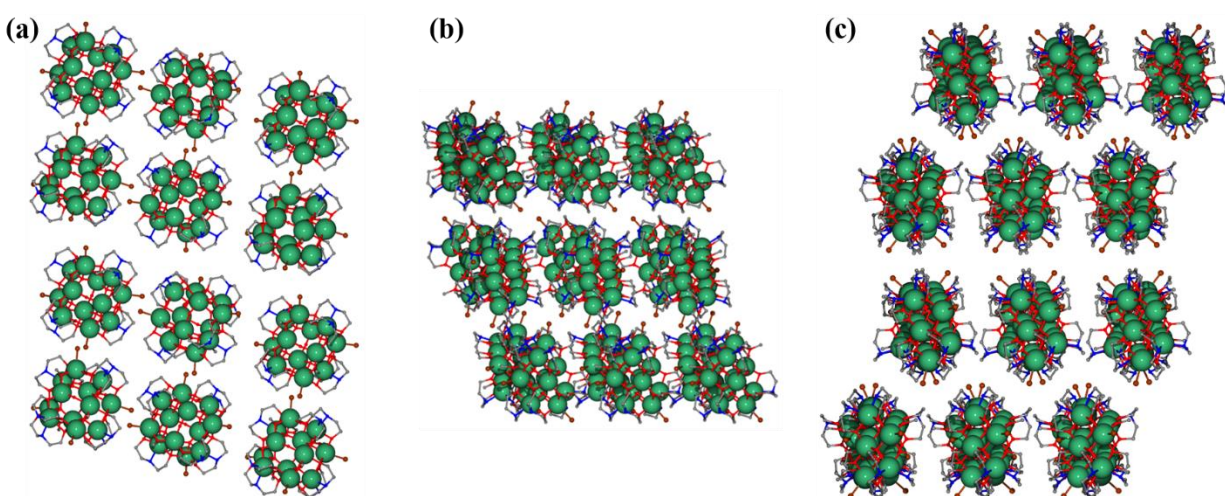

**Figure S9** Packing mode of **InOC-2** along axis *a*, *b* and *c*.

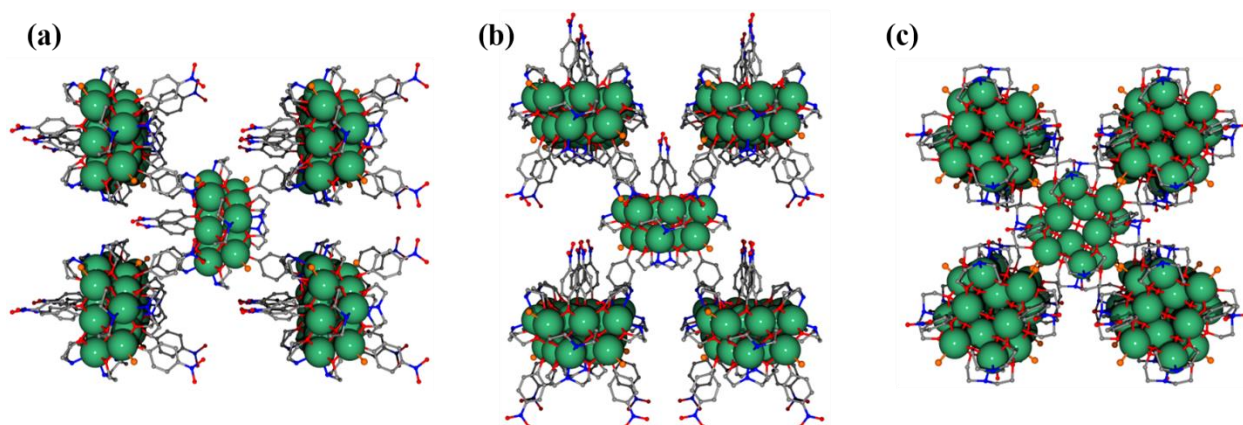

**Figure S10** Packing mode of **InOC-3** along axis *a*, *b* and *c*.

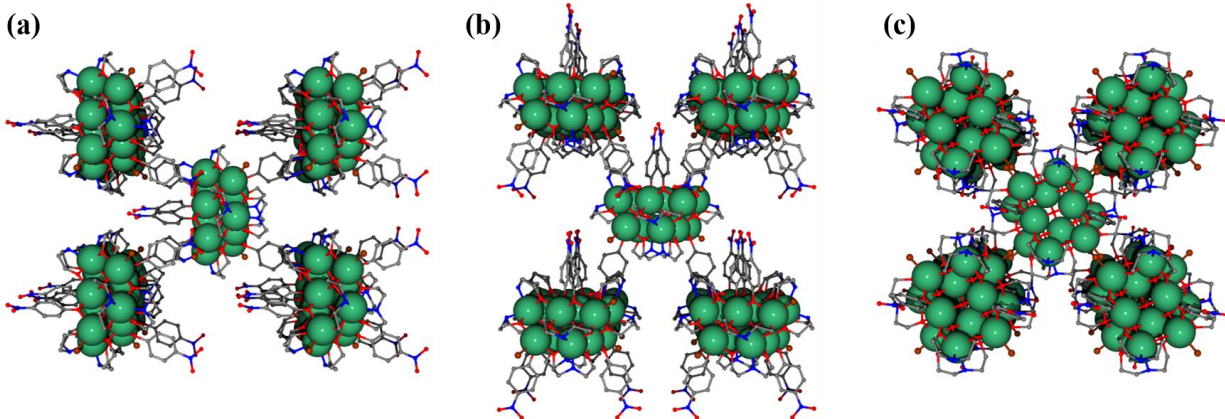

**Figure S11** Packing mode of **InOC-4** along axis *a*, *b* and *c*.

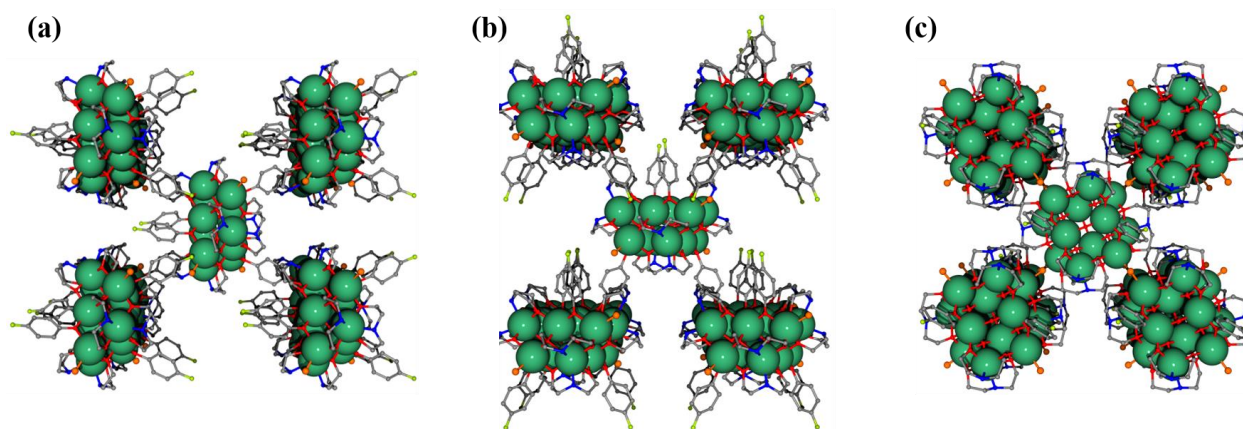

**Figure S12** Packing mode of **InOC-5** along axis *a*, *b* and *c*.



## VI. Powder-XRD patterns

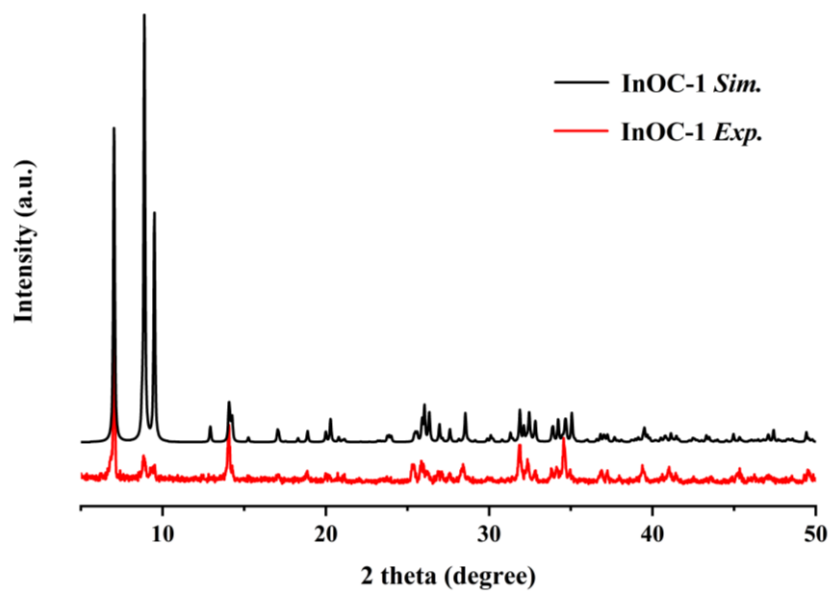

Figure S13 P-XRD analysis for InOC-1.

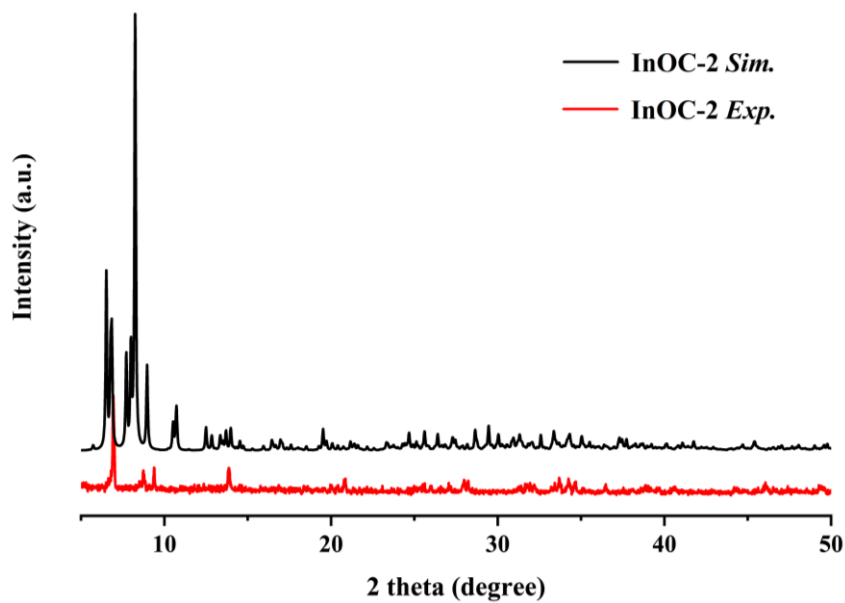

Figure S14 P-XRD analysis for InOC-2.

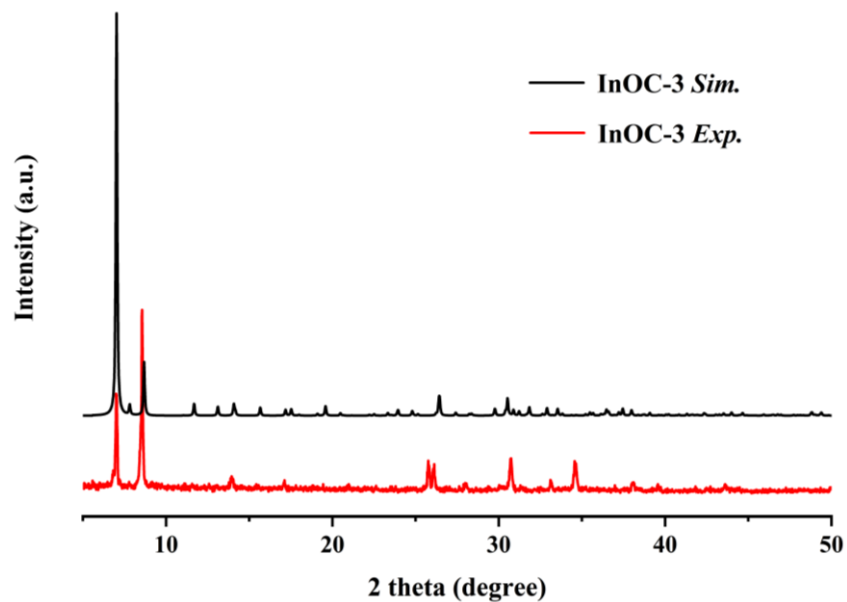

**Figure S15** P-XRD analysis for **InOC-3**.

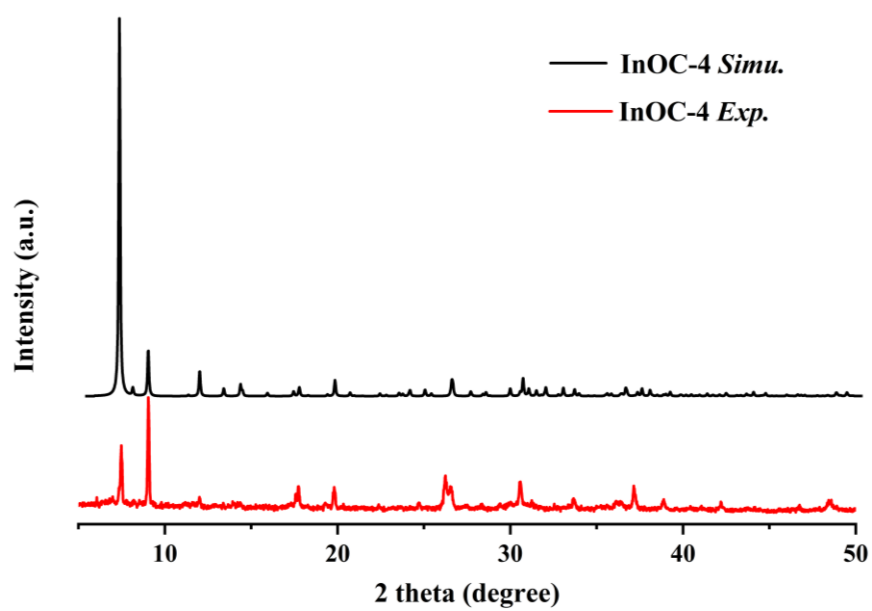

**Figure S16** P-XRD analysis for **InOC-4**.

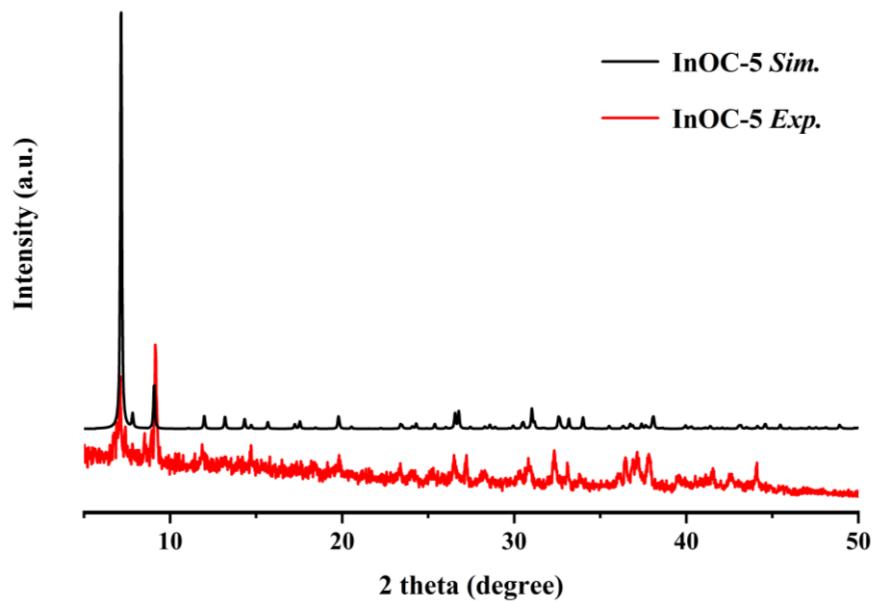

**Figure S17** P-XRD analysis for **InOC-5**.

## VII. The energy dispersive X-ray spectroscopy (EDS) spectra

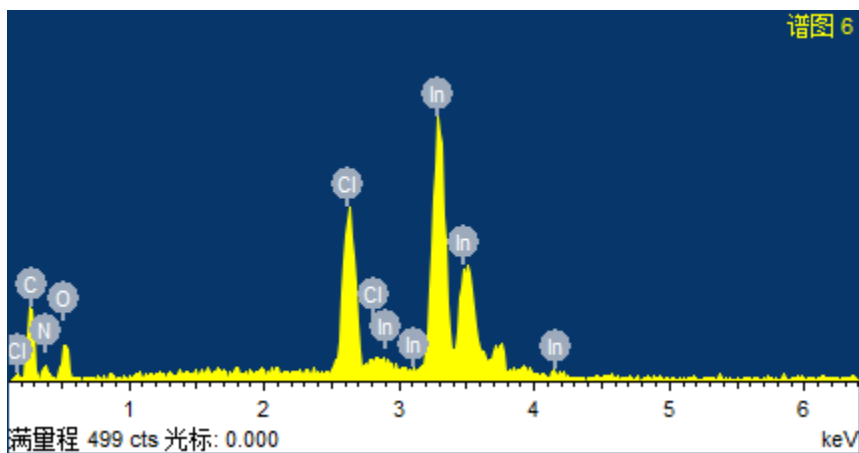

Figure S18 The EDS spectrum of InOC-1

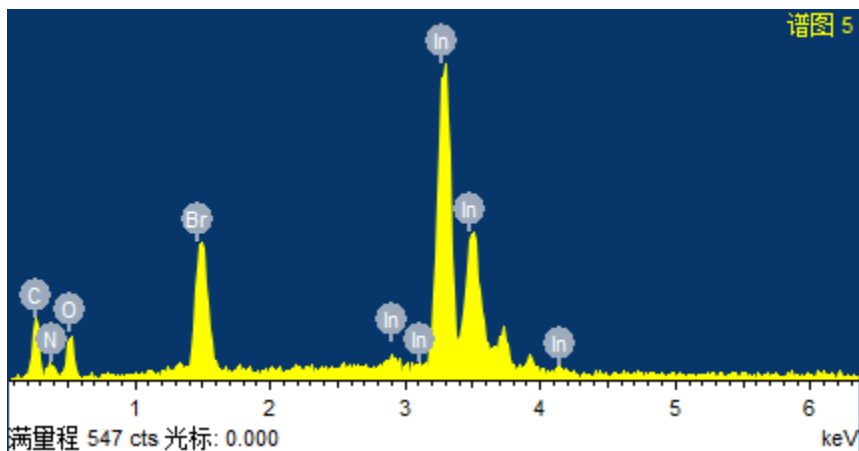

Figure S19 The EDS spectrum of InOC-2

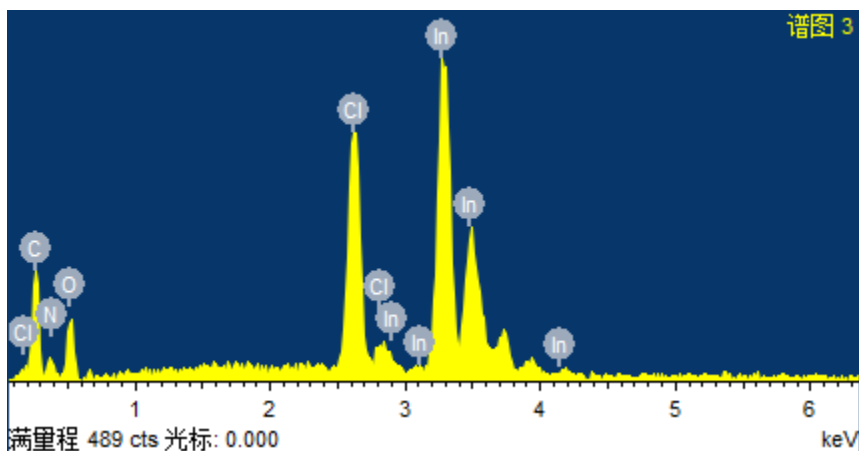

Figure S20 The EDS spectrum of InOC-3

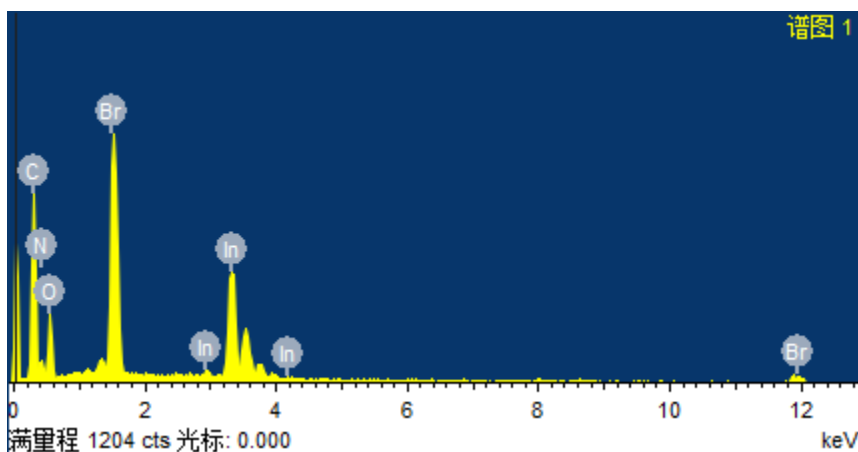

**Figure S21** The EDS spectrum of **InOC-4**

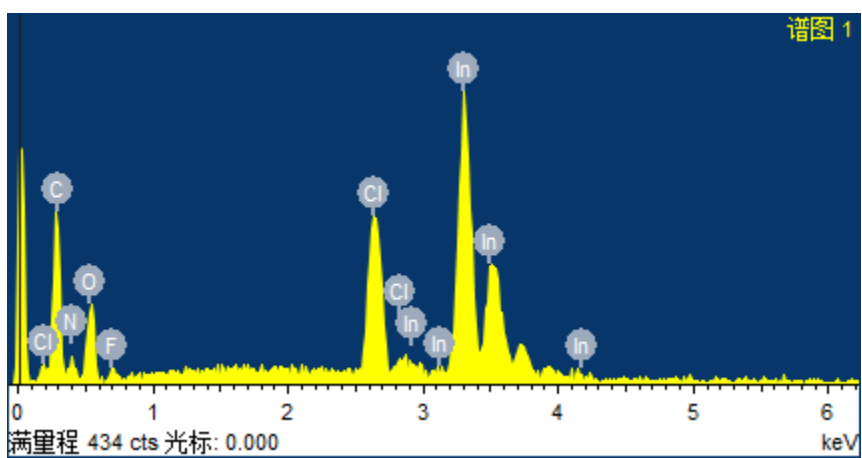

**Figure S22** The EDS spectrum of **InOC-5**

## VIII. Thermogravimetical analysis (TGA)

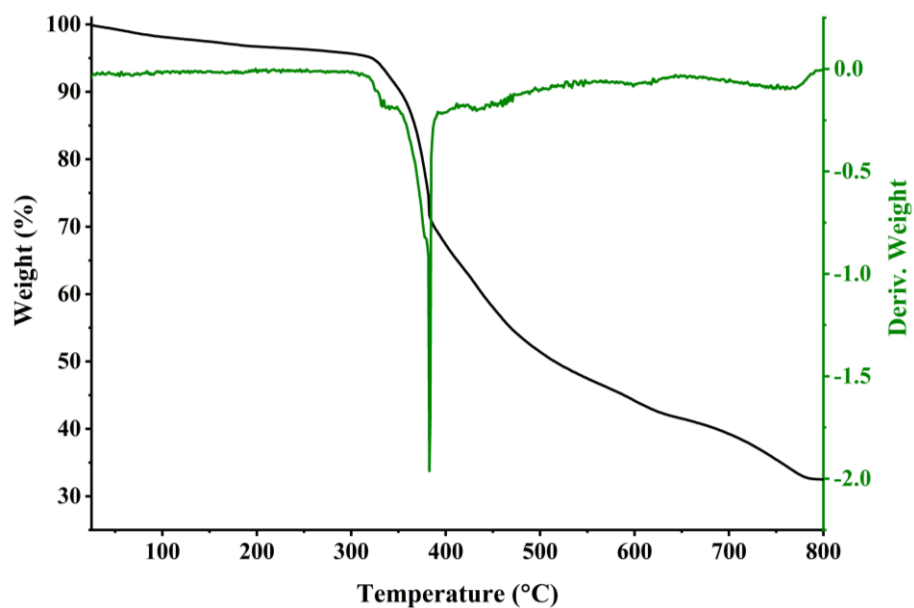

**Figure S23** TGA (black), derivative TGA (green) and curves for **InOC-1** from room temperature to 800 °C under N<sub>2</sub> atmosphere.

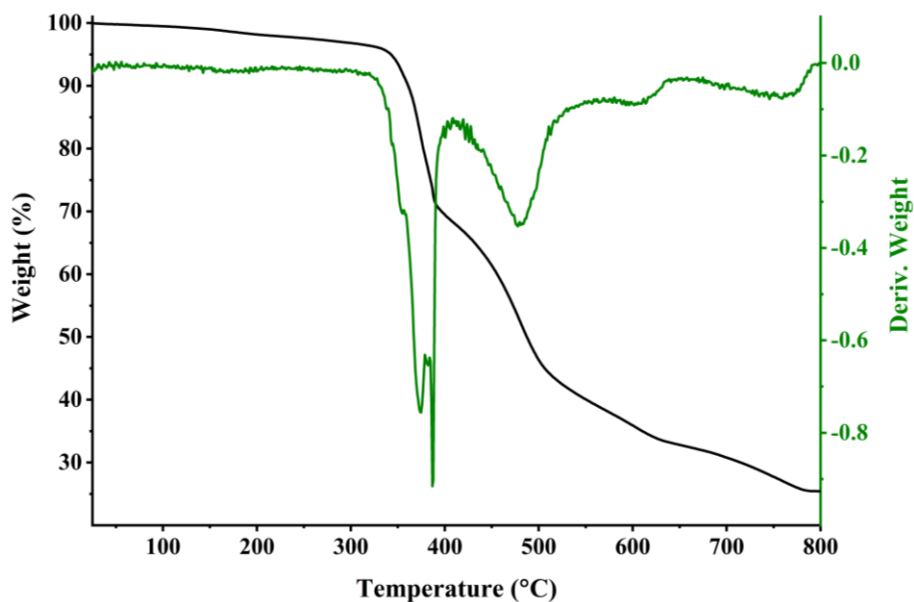

**Figure S24** TGA (black), derivative TGA (green) and curves for **InOC-2** from room temperature to 800 °C under N<sub>2</sub> atmosphere.

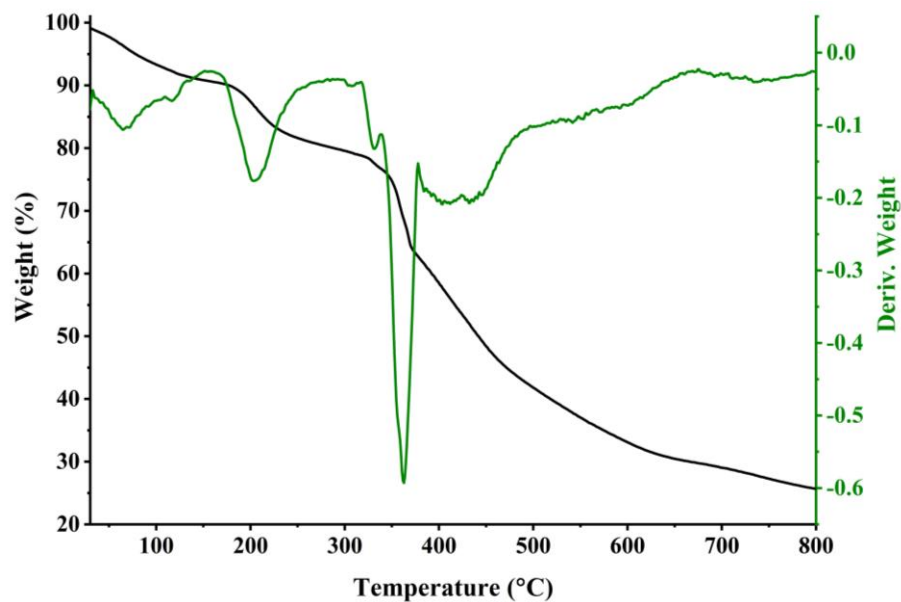

**Figure S25** TGA (black), derivative TGA (green) and curves for **InOC-3** from room temperature to 800 °C under N<sub>2</sub> atmosphere.

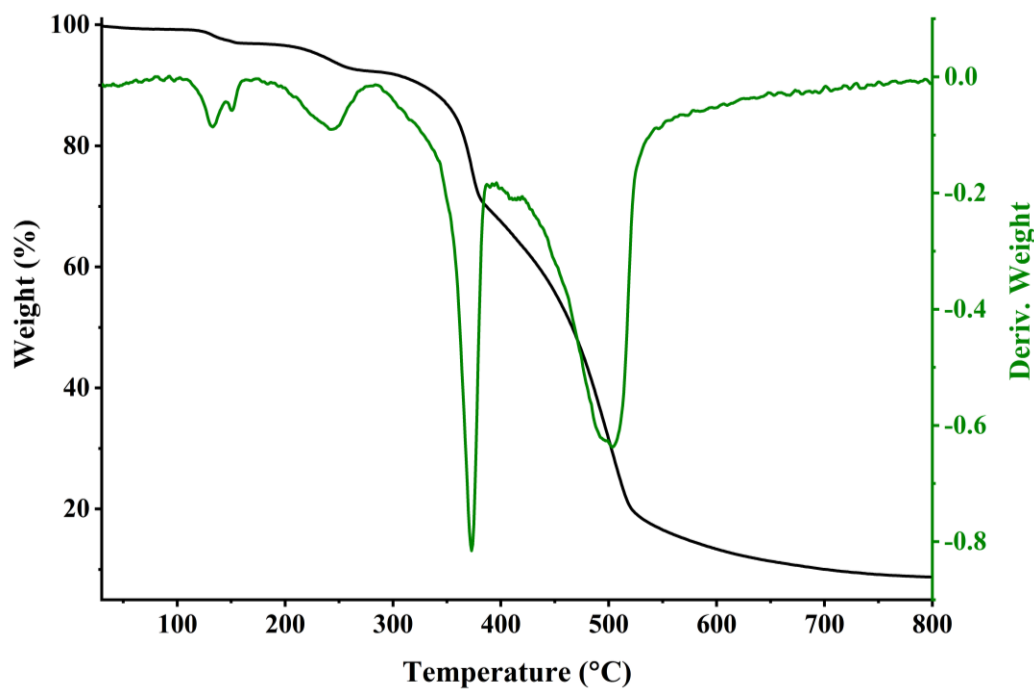

**Figure S26** TGA (black), derivative TGA (green) and curves for **InOC-4** from room temperature to 800 °C under N<sub>2</sub> atmosphere.

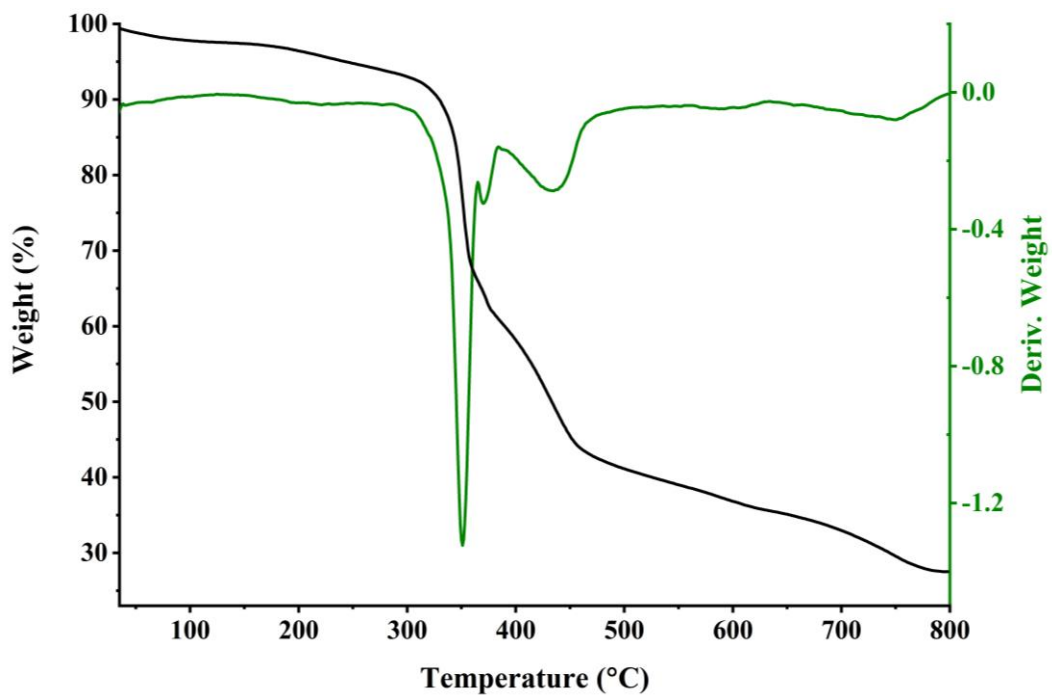

**Figure S27** TGA (black), derivative TGA (green) and curves for **InOC-5** from room temperature to 800 °C under N<sub>2</sub> atmosphere.



## IX. IR spectra

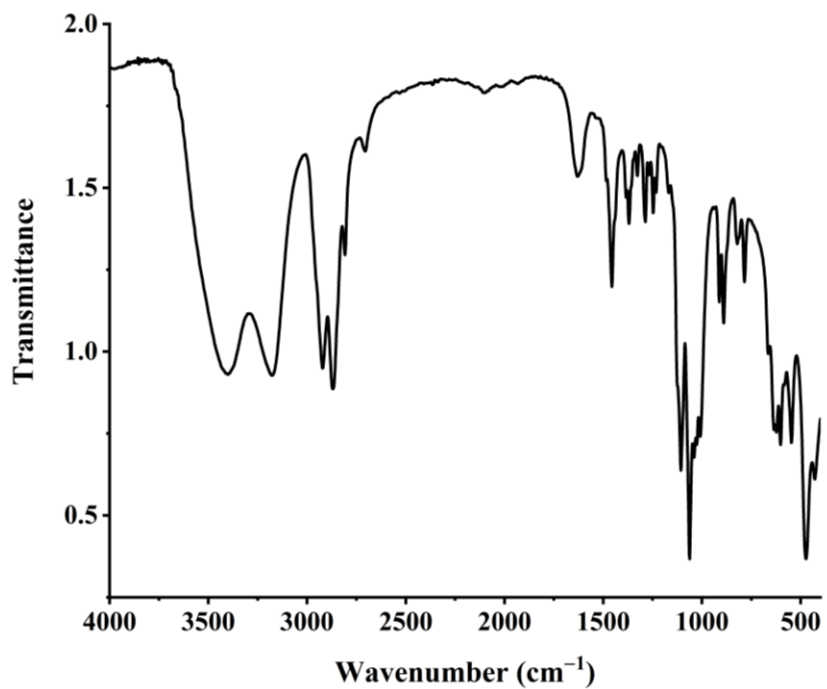

**Figure S28** FT-IR spectrum of InOC-1.

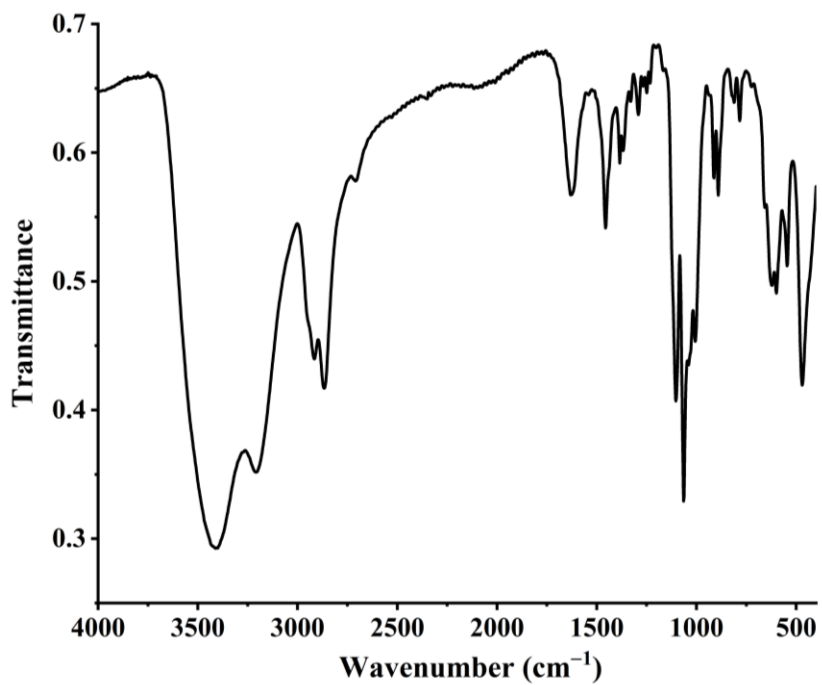

**Figure S29** FT-IR spectrum of InOC-2.

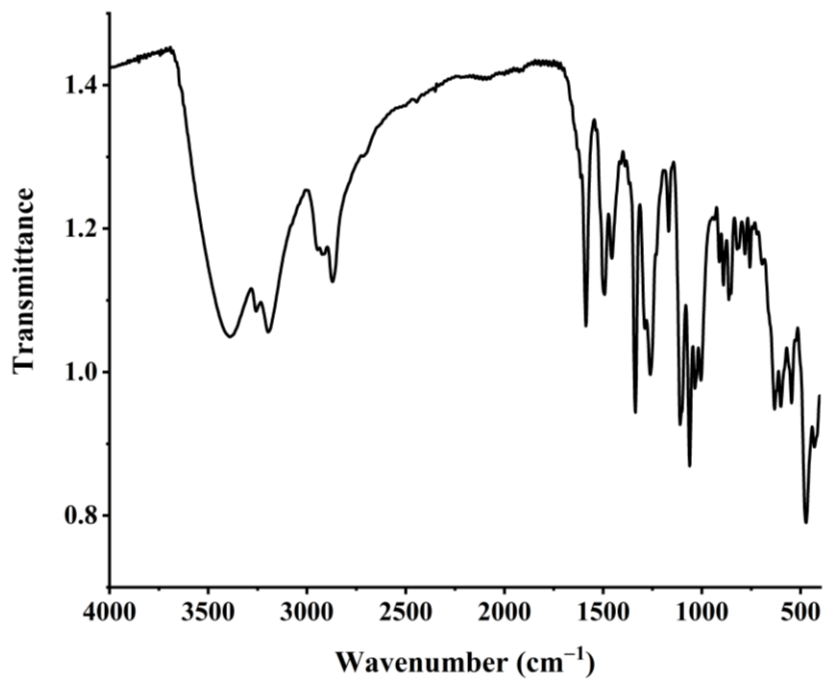

**Figure S30** FT-IR spectrum of **InOC-3**.

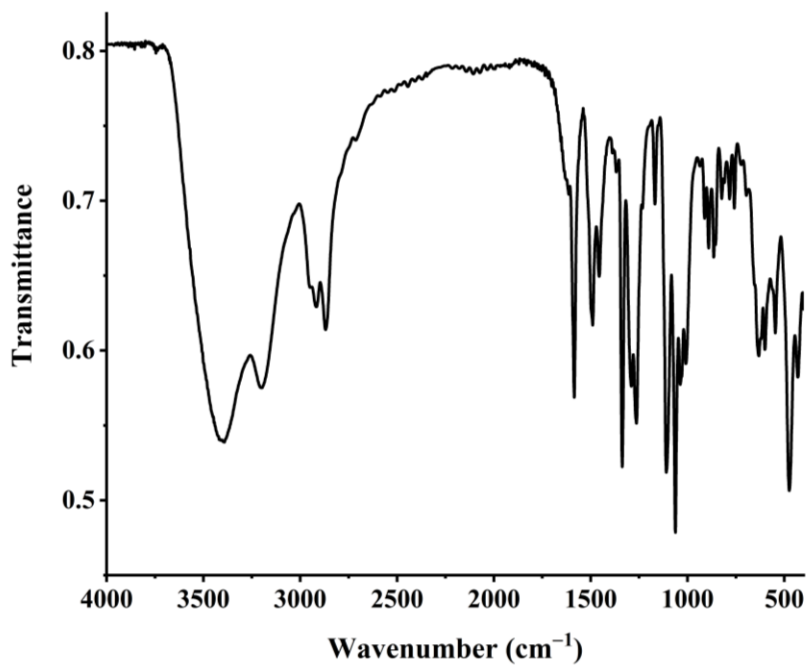

**Figure S31** FT-IR spectrum of **InOC-4**.

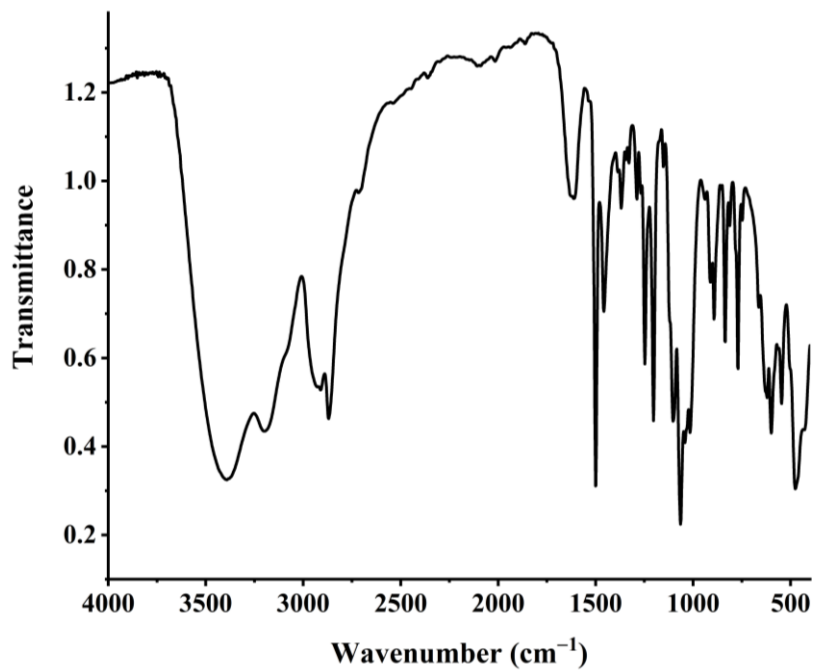

**Figure S32** FT-IR spectrum of **InOC-5**.

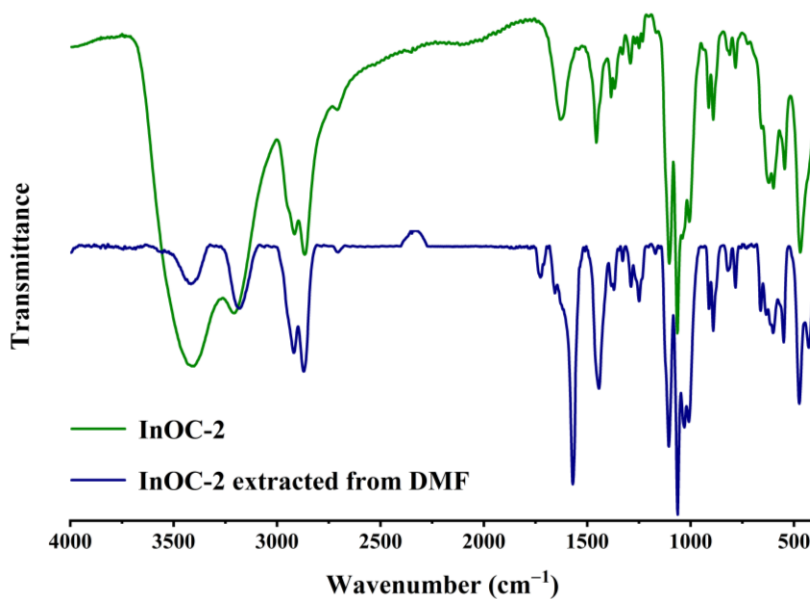

**Figure S33** Comparison of FT-IR spectra of **InOC-2** (olive) and **InOC-2** dissolved in DMF followed by extraction with assistance of PGMEA (navy).

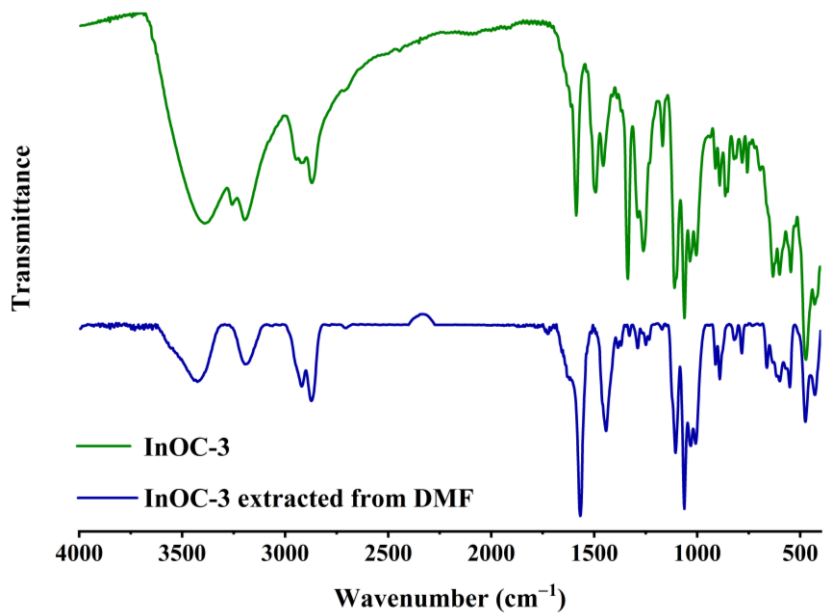

**Figure S34** Comparison of FT-IR spectra of **InOC-3** (olive) and **InOC-3** dissolved in DMF followed by extraction with assistance of PGMEA (navy).

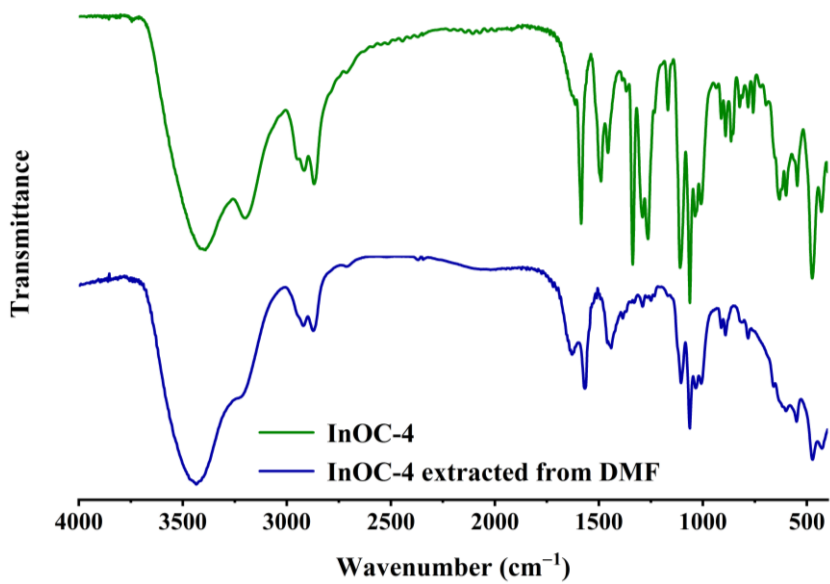

**Figure S35** Comparison of FT-IR spectra of **InOC-4** (olive) and **InOC-4** dissolved in DMF followed by extraction with assistance of PGMEA (navy).

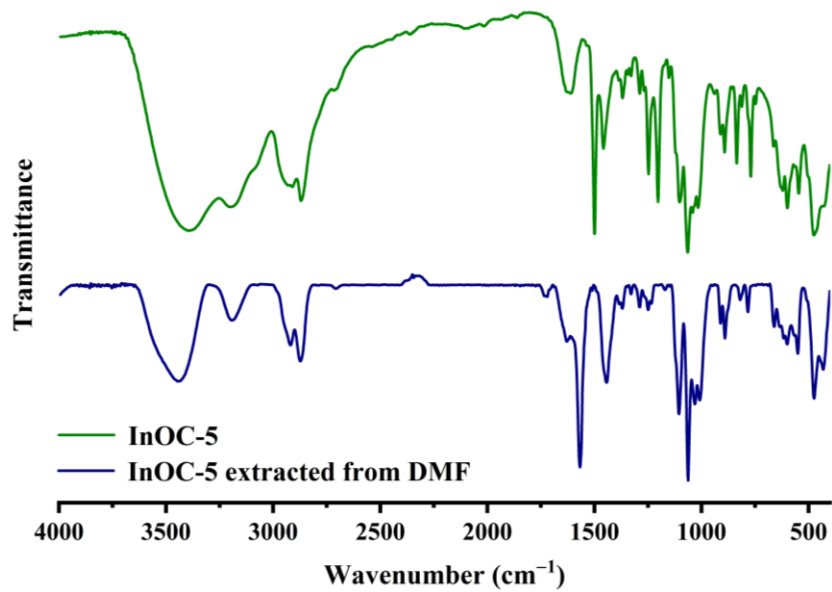

**Figure S36** Comparison of FT-IR spectra of **InOC-5** (olive) and **InOC-5** dissolved in DMF followed by extraction with assistance of PGMEA (navy).

## X. Electrospray ionization mass spectrometry measurements (ESI-MS)

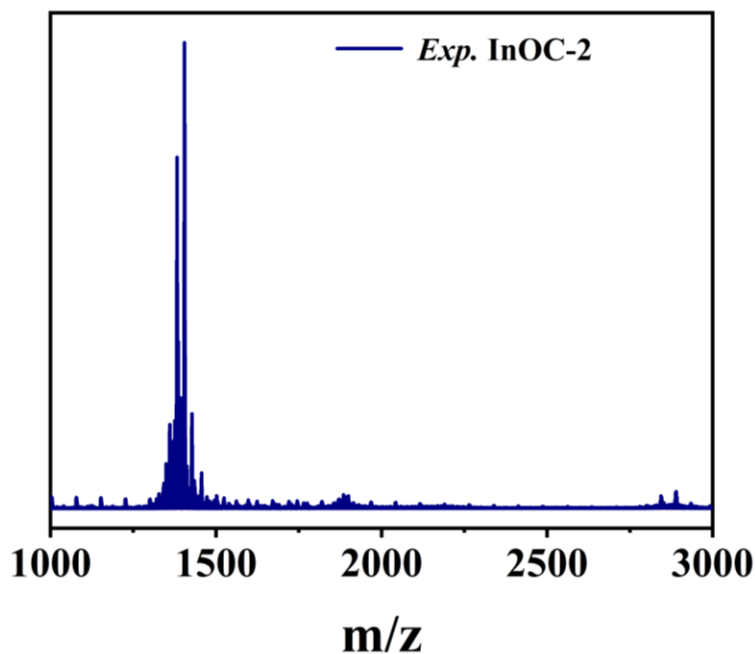

**Figure S37** Positive-mode ESI-MS spectrum of the mother liquor of **InOC-2**.

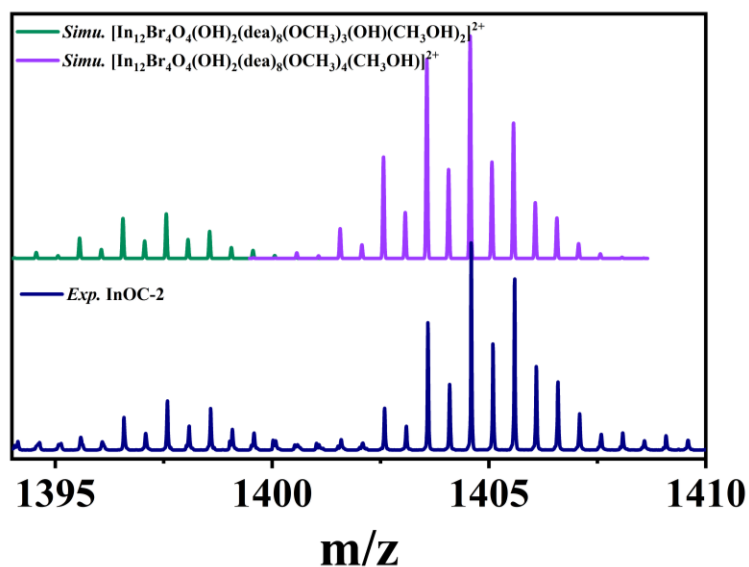

**Figure S38** The comparison of experimental isotopic envelope with simulated patterns of the predominant species of +2 charged  $\{\text{In}_{12}\text{-cluster}\}^{2+}$  **InOC-2**.

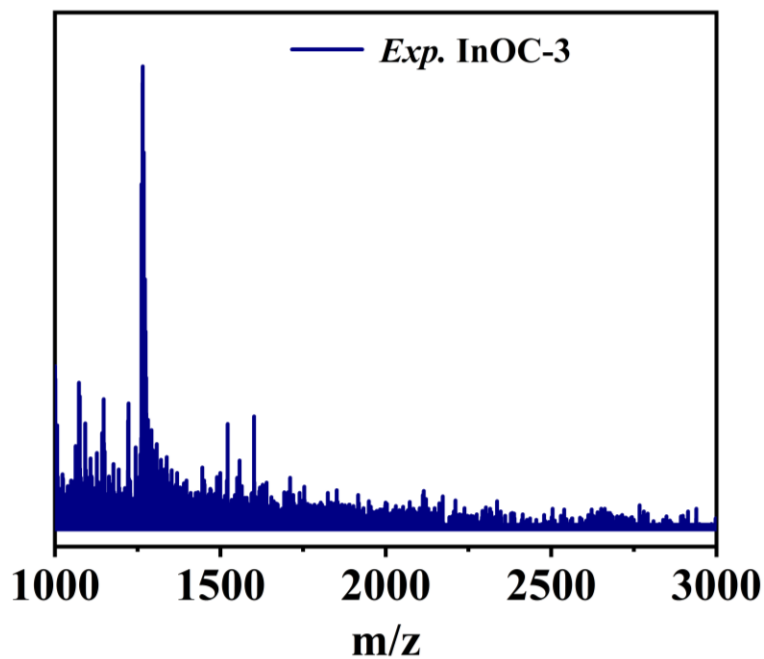

**Figure S39** Positive-mode ESI-MS spectrum of **InOC-3** in DMF.

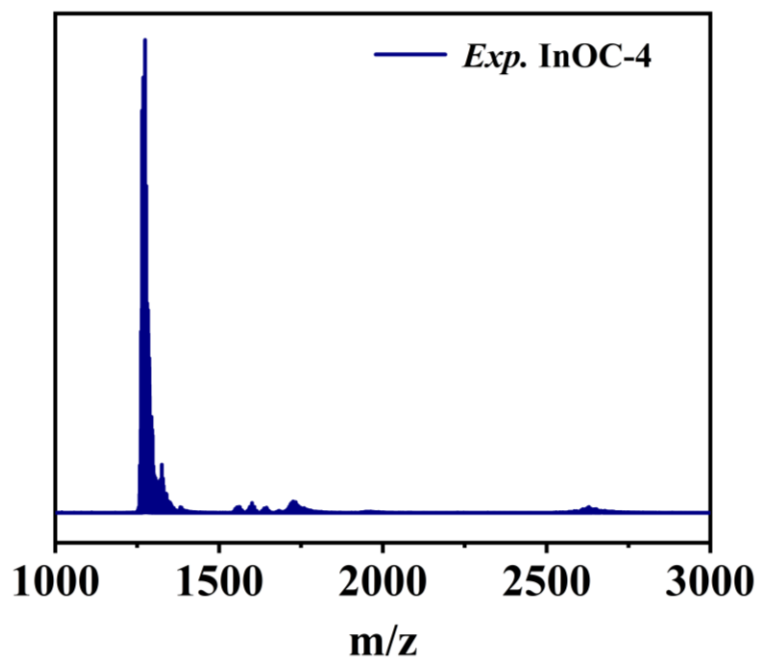

**Figure S40** Positive-mode ESI-MS spectrum of **InOC-4** in DMF.

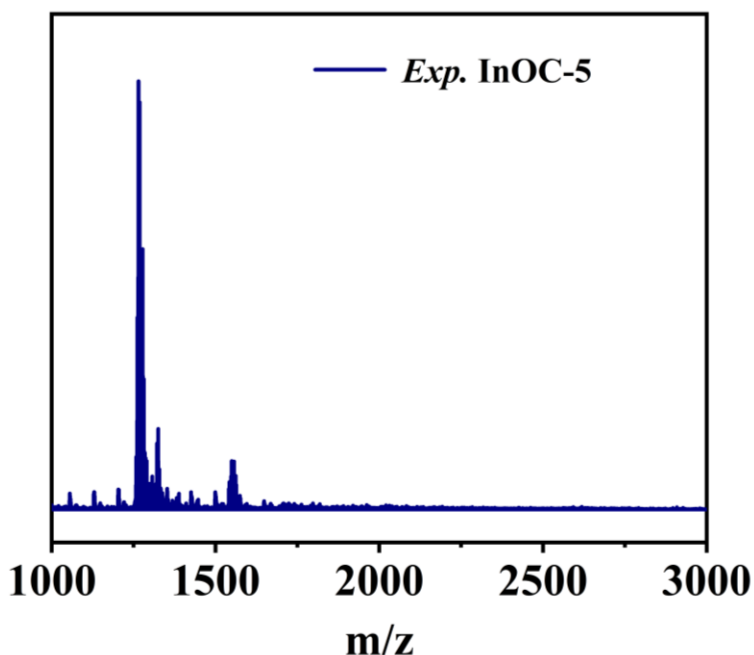

**Figure S41** Positive-mode ESI-MS spectrum of **InOC-5** in DMF.

**Table S11** Peak assignments for positive mode ESI-MS of **InOC-1** in DMF.

| Envelop assignment                                                                                                                                | charge | m/z ( <i>exp.</i> ) | m/z ( <i>cal.</i> ) |
|---------------------------------------------------------------------------------------------------------------------------------------------------|--------|---------------------|---------------------|
| $[\text{In}_{12}\text{Cl}_4\text{O}_4(\text{OH})_2(\text{OCH}_2\text{CH}_2\text{NHCH}_2\text{CH}_2\text{O})_8(\text{OH})_4]^{2+}$                 | +2     | 1254.57             | 1254.61             |
| $[\text{In}_{12}\text{Cl}_3\text{O}_4(\text{OH})_2(\text{OCH}_2\text{CH}_2\text{NHCH}_2\text{CH}_2\text{O})_8(\text{OCH}_3)_3(\text{OH})]^{2+}$   | +2     | 1258.09             | 1258.15             |
| $[\text{In}_{12}\text{Cl}_4\text{O}_4(\text{OH})_2(\text{OCH}_2\text{CH}_2\text{NHCH}_2\text{CH}_2\text{O})_8(\text{OCH}_3)(\text{OH})_3]^{2+}$   | +2     | 1261.59             | 1261.61             |
| $[\text{In}_{12}\text{Cl}_3\text{O}_4(\text{OH})_2(\text{OCH}_2\text{CH}_2\text{NHCH}_2\text{CH}_2\text{O})_8(\text{OCH}_3)_4]^{2+}$              | +2     | 1265.09             | 1265.18             |
| $[\text{In}_{12}\text{Cl}_4\text{O}_4(\text{OH})_2(\text{OCH}_2\text{CH}_2\text{NHCH}_2\text{CH}_2\text{O})_8(\text{OCH}_3)_2(\text{OH})_2]^{2+}$ | +2     | 1268.51             | 1268.62             |

**Table S12** Peak assignments for positive mode ESI-MS of **InOC-2** mother liquor.

| Envelop assignment                                                                                                                                                      | charge | m/z ( <i>exp.</i> ) | m/z ( <i>cal.</i> ) |
|-------------------------------------------------------------------------------------------------------------------------------------------------------------------------|--------|---------------------|---------------------|
| $[\text{In}_{12}\text{Br}_4\text{O}_4(\text{OH})_2(\text{OCH}_2\text{CH}_2\text{NHCH}_2\text{CH}_2\text{O})_8(\text{OCH}_3)_4(\text{CH}_3\text{OH})_2]^{2+}$            | +2     | 1402.60             | 1402.57             |
| $[\text{In}_{12}\text{Br}_4\text{O}_4(\text{OH})_2(\text{OCH}_2\text{CH}_2\text{NHCH}_2\text{CH}_2\text{O})_8(\text{OCH}_3)_3(\text{OH})(\text{CH}_3\text{OH})_2]^{2+}$ | +2     | 1395.56             | 1395.56             |



## XI. UV-Vis parameters

**Table S13** The concentration of the materials during the UV-Vis experiments.

| Code                        | Concentration (mol/L) | Code                        | Concentration (mol/L) |
|-----------------------------|-----------------------|-----------------------------|-----------------------|
| <b>InOC-3</b>               | $5.92 \cdot 10^{-5}$  | <b>InOC-4</b>               | $6.112 \cdot 10^{-5}$ |
| <b>InOC-5</b>               | $1.16 \cdot 10^{-4}$  | <b><i>p</i>-Nitrophenol</b> | $1.02 \cdot 10^{-3}$  |
| <b><i>p</i>-Flurophenol</b> | $2.86 \cdot 10^{-3}$  |                             |                       |

## XII. Patterning performance investigations

The 12~14 mg/mL DMF solution of **InOC-1**, **InOC-2** and **InOC-3** was spin-coated onto a pre-clean silicon wafer at 2000 or 3000 rpm for 30 seconds followed by baking on a hot plate at 70 °C for 30 seconds. The film with a thickness of ca. 14 to 20 nm was then exposed to electron beam radiation with doses of 10 to 1200  $\mu\text{C}/\text{cm}^2$ . As indicated in the scanning electron microscope (SEM) and atomic force microscope (AFM) images, well-defined negative tone patterns were obtained after development. Unfortunately, no matter on the hydrophilic or hydrophobic Si-substrate, **InOC-4** or **InOC-5** only formulated poor quality films unsuitable for EBL evaluations. We think the subtle fluctuations in the structures or compositions of the  $\text{In}_{12}$ -oxo clusters dominate their Hansen solubility parameters (HSP) and surface tension of the resulting solution, which determine whether smooth films can be formed on the Si-substrate.

**Table S14** Film thickness of **InOC-1** to **InOC-3** on the Si-wafer.

| Code          | Thickness (nm) | Code          | Thickness (nm) | Code          | Thickness (nm) |
|---------------|----------------|---------------|----------------|---------------|----------------|
| <b>InOC-1</b> | 15             | <b>InOC-2</b> | 18             | <b>InOC-3</b> | 14             |

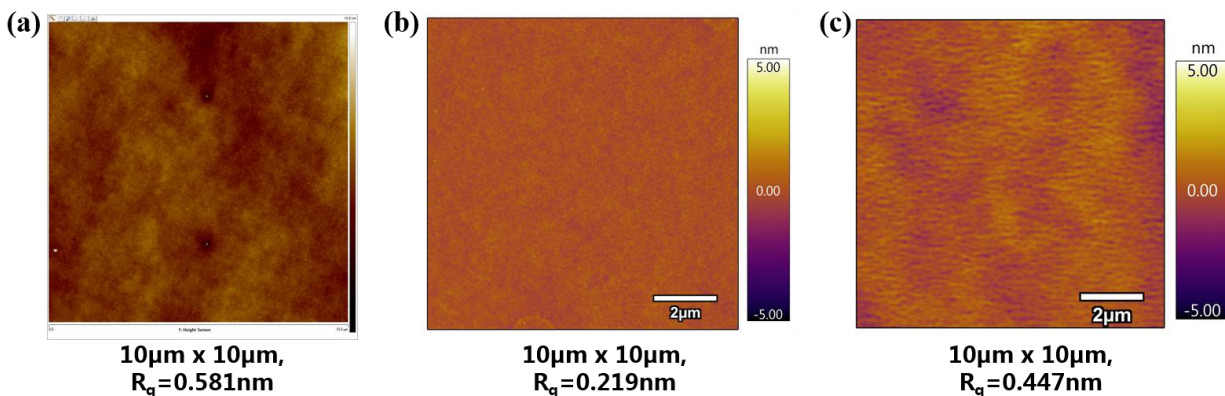

**Figure S42** Topographic AFM images with  $R_q$  roughness in the areas of 10  $\mu\text{m}$  x 10  $\mu\text{m}$  for **InOC-1** (a), **InOC-2** (b), **InOC-3** (c).  $R_q$  roughness is defined here as the square root of the arithmetic mean of the squares of each z value measured on an AFM image.

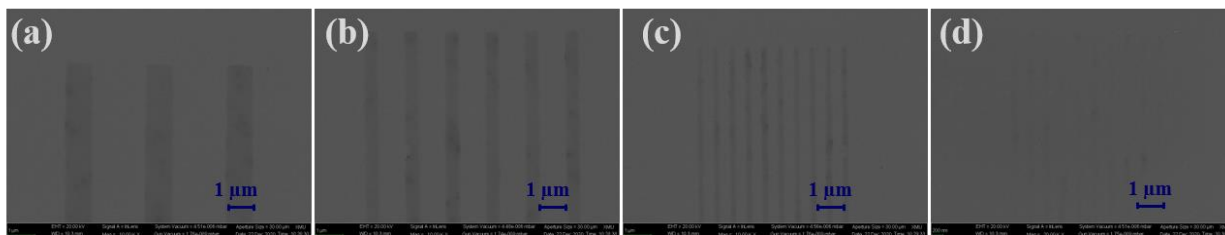

**Figure S43** SEM images of patterns performed with dose of  $1000 \mu\text{C}/\text{cm}^2$  exhibiting different feature sizes of  $1 \mu\text{m}$  (a),  $500 \text{ nm}$  (b),  $200 \text{ nm}$  (c) and  $100 \text{ nm}$  (d) for **InOC-1**.

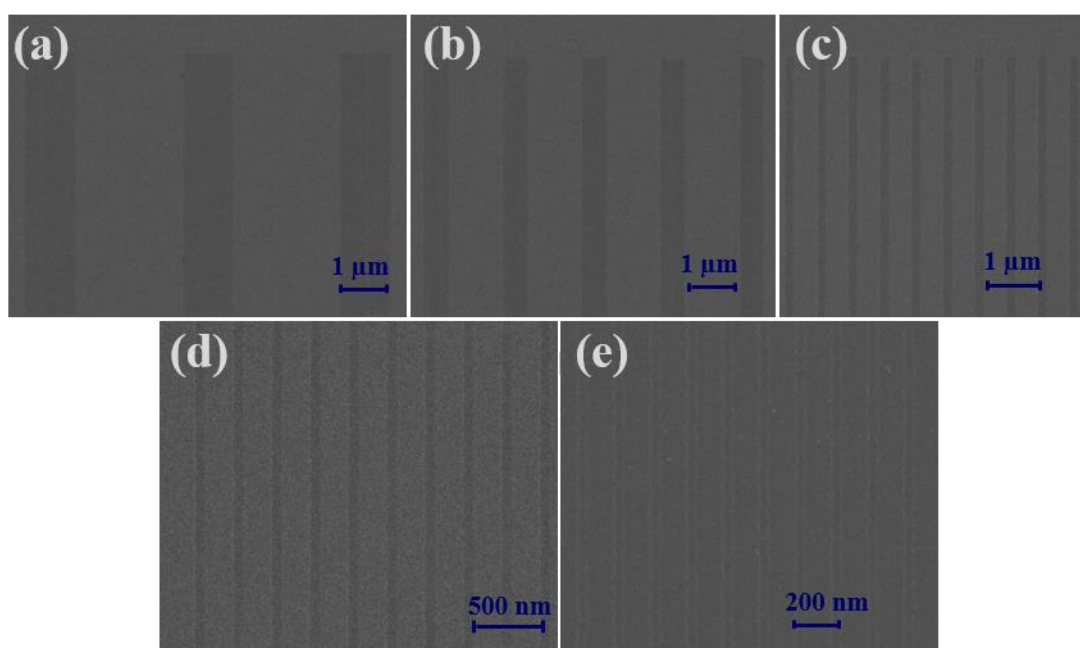

**Figure S44** SEM images of patterns performed with dose of  $1000 \mu\text{C}/\text{cm}^2$  exhibiting different feature sizes of  $1 \mu\text{m}$  (a),  $500 \text{ nm}$  (b),  $200 \text{ nm}$  (c),  $100 \text{ nm}$  (d) and  $50 \text{ nm}$  (e) for **InOC-2**.

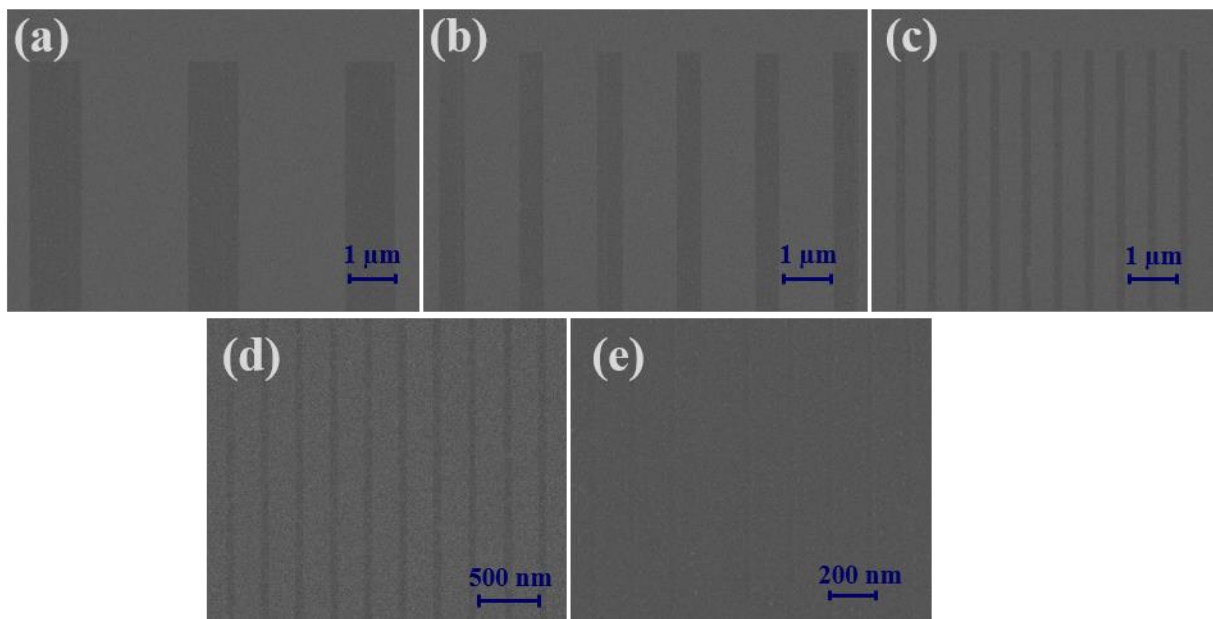

**Figure S45** SEM images of patterns performed with dose of  $1000 \mu\text{C}/\text{cm}^2$  exhibiting different feature sizes of  $1 \mu\text{m}$  (a),  $500 \text{ nm}$  (b),  $200 \text{ nm}$  (c),  $100 \text{ nm}$  (d) and  $50 \text{ nm}$  (e) for **InOC-3**.

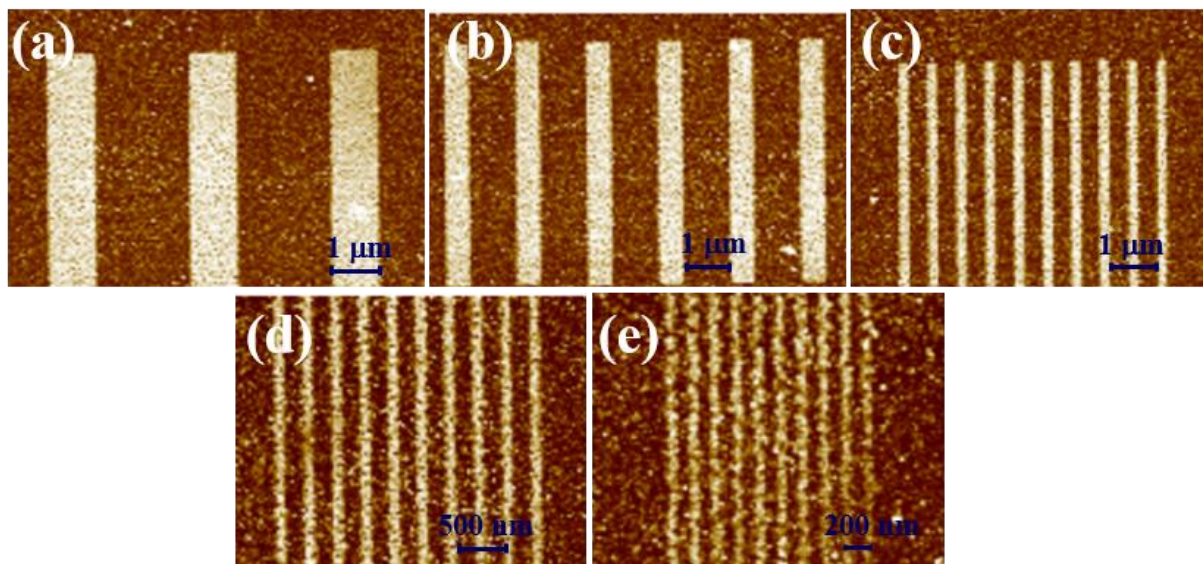

**Figure S46** AFM images of patterns performed with dose of  $500 \mu\text{C}/\text{cm}^2$  exhibiting different feature sizes of  $1 \mu\text{m}$  (a),  $500 \text{ nm}$  (b),  $200 \text{ nm}$  (c),  $100 \text{ nm}$  (d) and  $50 \text{ nm}$  (e) for **InOC-3**.

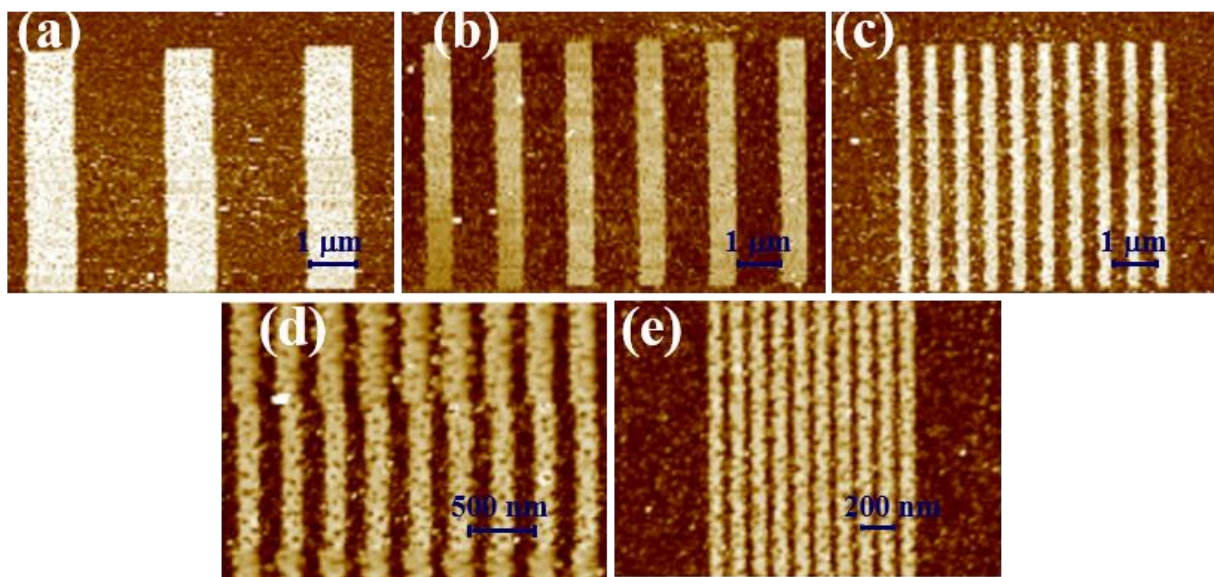

**Figure S47** AFM images of patterns performed with dose of  $1000 \mu\text{C}/\text{cm}^2$  exhibiting different feature sizes of  $1 \mu\text{m}$  (a),  $500 \text{ nm}$  (b),  $200 \text{ nm}$  (c),  $100 \text{ nm}$  (d) and  $50 \text{ nm}$  (e) for **InOC-3**.

- [1] O. V. Dolomanov, L. J. Bourhis, R. J. Gildea, J. A. K. Howard, H. Puschmann, *J. Appl. Crystallogr.* **2009**, *42*, 339-341.
- [2] a) G. M. Sheldrick, *Acta Crystallogr.* **2015**, *C71*, 3-8; b) G. M. Sheldrick, *Acta Crystallogr.* **2008**, *A64*, 112-122.
- [3] a) I. D. Brown, D. Altermatt, *Acta Crystallogr.* **1985**, *B41*, 244-247; b) K. Knížek, *Kalvados – Software for crystal structure and powder diffraction*; see <http://www.fzu.cz/~knizek/kalvados/index.html>.
